# 1 **Precocious neuronal differentiation and disrupted oxygen responses** 2 **in Kabuki syndrome**

3  
4 Giovanni A. Carosso<sup>1,2</sup>, Leandros Boukas<sup>1,2,3</sup>, Jonathan J. Augustin<sup>2,4,5</sup>, Ha Nam Nguyen<sup>6</sup>, Briana L. Winer<sup>2</sup>,  
5 Gabrielle H. Cannon<sup>2</sup>, Johanna D. Robertson<sup>2</sup>, Li Zhang<sup>2</sup>, Kasper D. Hansen<sup>2,3</sup>, Loyal A. Goff<sup>2,5</sup>, Hans T.  
6 Bjornsson<sup>\*2,7,8,9</sup>

7  
8 <sup>1</sup>Predoctoral Training Program in Human Genetics, McKusick-Nathans Institute of Genetic Medicine, Johns  
9 Hopkins University School of Medicine, Baltimore, United States.

10 <sup>2</sup>McKusick-Nathans Institute of Genetic Medicine, Johns Hopkins University School of Medicine, Baltimore,  
11 United States.

12 <sup>3</sup>Department of Biostatistics, Johns Hopkins University School of Medicine, Baltimore, United States.

13 <sup>4</sup>Predoctoral Training Program in Biochemistry, Cellular, and Molecular Biology, Johns Hopkins University  
14 School of Medicine, Baltimore, United States.

15 <sup>5</sup>Solomon H. Snyder Department of Neuroscience, Johns Hopkins University School of Medicine, Baltimore,  
16 United States.

17 <sup>6</sup>Institute for Cell Engineering, Johns Hopkins University School of Medicine, Baltimore, United States.

18 <sup>7</sup>Department of Pediatrics, Johns Hopkins University School of Medicine, Baltimore, United States.

19 <sup>8</sup>Faculty of Medicine, School of Health Sciences, University of Iceland, Reykjavik, Iceland.

20 <sup>9</sup>Landspítali University Hospital, Reykjavik, Iceland.

21  
22 \*Correspondence:

23 Hans Tomas Bjornsson, M.D., Ph.D.

24 Johns Hopkins University School of Medicine

25 733 N Broadway, MRB 415

26 Baltimore, MD, 21205

27 Telephone: 4105020056

28 Email: [hbjorns1@jhmi.edu](mailto:hbjorns1@jhmi.edu)

29  
30 Conflict of interest: The authors declare no conflict of interest.

31

## 32 Abstract

33 Chromatin modifiers act to coordinate gene expression changes critical to neuronal  
34 differentiation from neural stem/progenitor cells (NSPCs). Lysine-specific methyltransferase 2D  
35 (*KMT2D*) encodes a histone methyltransferase that promotes transcriptional activation, and is  
36 frequently mutated in cancers and in the majority (>70%) of patients diagnosed with the congenital,  
37 multisystem intellectual disability (ID) disorder Kabuki syndrome 1 (KS1). Critical roles for *KMT2D* are  
38 established in various non-neural tissues, but the effects of *KMT2D* loss in brain cell development  
39 have not been described. We conducted parallel studies of proliferation, differentiation, transcription,  
40 and chromatin profiling in *KMT2D*-deficient human and mouse models to define *KMT2D*-regulated  
41 functions in neurodevelopmental contexts, including adult-born hippocampal NSPCs in vivo and in  
42 vitro. We report cell-autonomous defects in proliferation, cell cycle, and survival, accompanied by  
43 early NSPC maturation in several *KMT2D*-deficient model systems. Transcriptional suppression in  
44 *KMT2D*-deficient cells indicated strong perturbation of hypoxia-responsive metabolism pathways.  
45 Functional experiments confirmed abnormalities of cellular hypoxia responses in *KMT2D*-deficient  
46 neural cells, and accelerated NSPC maturation in vivo. Together, our findings support a model in  
47 which loss of *KMT2D* function suppresses expression of oxygen-responsive gene programs important  
48 to neural progenitor maintenance, resulting in precocious neuronal differentiation in a mouse model of  
49 KS1.

50

## 51 Graphical Abstract

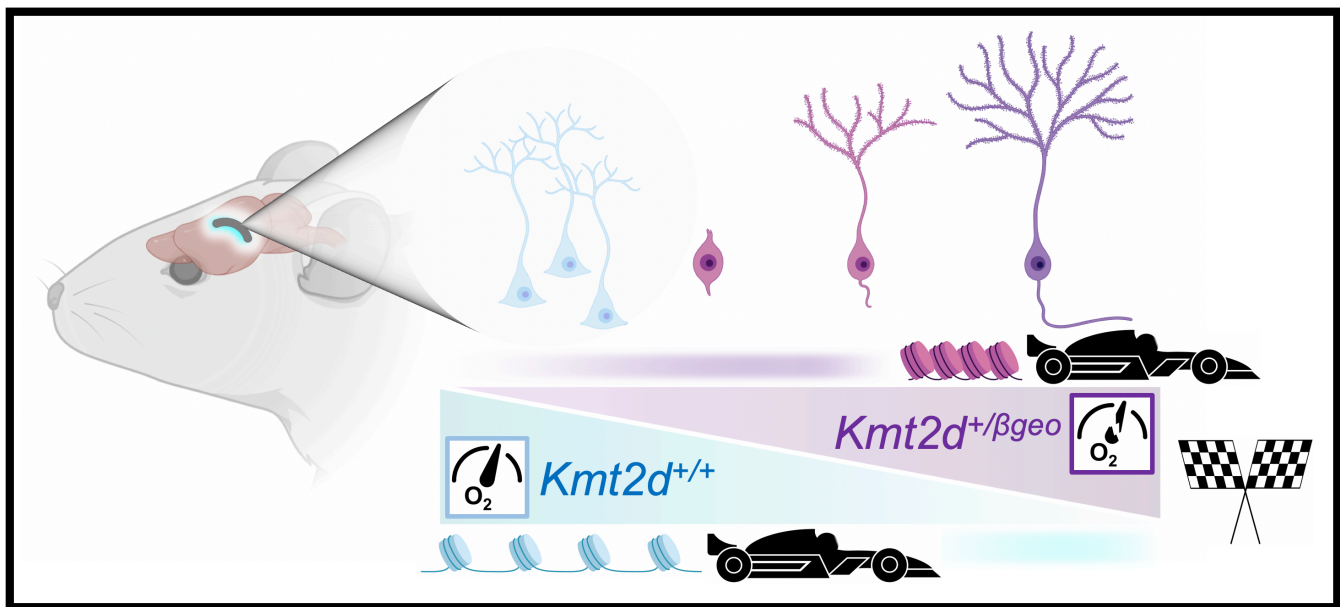

52

53

## 54 **Introduction**

55 Trithorax group proteins promote chromatin accessibility by exerting antagonistic functions  
56 against Polycomb group transcriptional suppressors to activate gene expression (1). Fine-tuning of  
57 cell type transitions during neuronal development from NSPCs depends critically on this duality, as  
58 evidenced by severe neurodevelopmental defects caused by variants in numerous chromatin-  
59 modifying genes (2). Loss-of-function variants in genes encoding two such enzymes, KMT2D and  
60 lysine-specific demethylase 6A (KDM6A/UTX) cause the ID disorder KS (KS1 and KS2, respectively) (3,  
61 4). Up to 74% (5) of KS cases result from mutations in *KMT2D* (KS1), encoding a major histone H3  
62 lysine 4 (H3K4) methyltransferase which catalyzes chromatin-opening modifications at context-  
63 specific targets. Developmental requirements for KMT2D in cardiac precursors (6), B cells (7, 8),  
64 muscle and adipose (9), and epithelial tissues (10) have been linked, respectively, to *KMT2D*-  
65 associated cardiac, immunologic, and oncogenic phenotypes (11), yet the effects of KMT2D  
66 deficiency in neurodevelopment are not yet understood.

67 We previously described a mouse model of KS1, *Kmt2d*<sup>+/βgeo</sup>, demonstrating characteristic  
68 features including craniofacial abnormalities and visuospatial memory impairments, associated with  
69 decreased adult-born hippocampal NSPCs in the dentate gyrus (DG) (12). Decreased DG grey matter  
70 volume was subsequently observed in KS1 patients (13). The continual birth and integration of new  
71 neurons makes adult neurogenesis the most potent form of lifelong plasticity in the mammalian brain  
72 (14), though recent studies have disagreed on its extent in humans (15–17). During late embryonic  
73 stages, a subset of multipotent NSPCs persists in the DG (18), becoming subject to an array of  
74 intrinsic and extrinsic factors affecting NSPC maintenance, i.e. self-renewal, proliferation, and  
75 neuronal differentiation, throughout adult life. Mounting evidence tightly links metabolic rewiring (19)  
76 and hypoxic states in the DG (20, 21) to cell-intrinsic regulation of NSPC maintenance.

77 Here, we find that KMT2D deficiency strongly suppresses metabolic gene expression and  
78 leads to reduced proliferation, abnormal hypoxia responses, and precocious neuronal maturation in  
79 multiple KS1 model systems. Importantly, these phenotypes were validated in vivo in a KS1 mouse  
80 model, supporting a role for these abnormalities in the pathogenesis of KS1-associated ID.

## 81 Results

82

### 83 Genetic ablation of the *Kmt2d* SET methyltransferase domain disrupts proliferation and cell 84 cycle in a cell-autonomous manner

85 We first selected the HT22 mouse hippocampal neuronal cell line (22) for analysis of KMT2D  
86 catalytic function in neuronal context. gDNA sequence encoding the Su(var)3-9, enhancer-of-zeste  
87 and trithorax (SET) methyltransferase domain was deleted by CRISPR-Cas9 with an upstream small  
88 guide RNA (sgRNA<sup>up</sup>) in exon 52, and either sgRNA<sup>1</sup> (exon 54) or sgRNA<sup>2</sup> (intron 54), resulting in  
89 deletions of 565 bp (*Kmt2d*<sup>Δ1</sup>) or 654 bp (*Kmt2d*<sup>Δ2</sup>), respectively, as verified by Sanger DNA  
90 sequencing, in silico translation, and PCR (**Supplementary Figure 1A-B**). Targeted cells were clonally  
91 expanded to establish heterozygous (*Kmt2d*<sup>+Δ</sup>) and homozygous (*Kmt2d*<sup>ΔΔ</sup>) cell lines for comparison  
92 against the parental wild-type line (*Kmt2d*<sup>+/+</sup>). Both biological replicate alleles, *Kmt2d*<sup>Δ1</sup> and *Kmt2d*<sup>Δ2</sup>,  
93 were represented in present studies thus the combined data are denoted hereafter simply as *Kmt2d*<sup>+Δ</sup>  
94 or *Kmt2d*<sup>ΔΔ</sup>. *Kmt2d* mRNA encoded within the targeted region was ~50% decreased in *Kmt2d*<sup>+Δ</sup> cells  
95 and absent in *Kmt2d*<sup>ΔΔ</sup> cells, while *Kmt2d* mRNA from exons upstream of the deletion site was  
96 unaffected (**Supplementary Figure 1C**). Immunofluorescence against KMT2D, detecting a peptide  
97 sequence upstream of deletions (**Supplementary Figure 1D**), demonstrated distinctly nuclear KMT2D  
98 distribution in *Kmt2d*<sup>+/+</sup> cells but more diffuse distribution in *Kmt2d*<sup>+Δ</sup> and *Kmt2d*<sup>ΔΔ</sup> cells, while we  
99 observed uniformly nuclear expression of a neuronal nuclear marker, RNA binding protein fox-1  
100 homolog 3 (RBF3), independent of genotype (**Figure 1A**).

101 Proliferation analysis after equal-density plating revealed cell densities ~52% lower in *Kmt2d*<sup>+Δ</sup>  
102 cells and ~39% lower in *Kmt2d*<sup>ΔΔ</sup> cells, compared to wild-type (**Figure 1B**). This defect was supported  
103 by dye-based generational tracking, detecting modestly reduced dilution of a fluorescent tracer, i.e.  
104 fewer cell divisions, in *Kmt2d*<sup>+Δ</sup> and *Kmt2d*<sup>ΔΔ</sup> daughter cells compared to wild-type (**Figure 1C**,  
105 **Supplementary Figure 1E**), while initial dye uptake in parental cells was genotype-independent. Flow  
106 cytometric analysis of cell cycle occupancy, using marker of proliferation Ki-67 (KI67) and a DNA label,  
107 revealed that *Kmt2d*<sup>+Δ</sup> cells and *Kmt2d*<sup>ΔΔ</sup> cells were enriched for S and G<sub>2</sub> phase, compared to wild-  
108 type (**Figure 1D**, **Supplementary Figure 1F**). To characterize temporal dynamics of cell cycle  
109 progression, we synchronized cells in G<sub>2</sub>/M phase and analyzed DNA content at timepoints after  
110 release (**Figure 1E**). Wild-type cells exited G<sub>2</sub>/M phase at higher rates than *Kmt2d*<sup>ΔΔ</sup> cells, at 3 hours  
111 and up to 18 hours after release. Cell death was profiled by flow cytometric detection of caspase-3/7

112 substrate cleavage to distinguish early apoptotic cells. Compared to wild-types, apoptotic cell  
113 proportions were greater in both *Kmt2d*<sup>+/ $\Delta$</sup>  cells (~287%) and *Kmt2d* <sup>$\Delta$ / $\Delta$</sup>  cells (~478%) (**Figure 1F**).

114 To examine proliferation in primary hippocampal progenitors, we isolated NSPCs from micro-  
115 dissected DG of *Kmt2d*<sup>+/ $\beta$ geo</sup> mice and wild-type littermates. NSPCs exhibited characteristic expression  
116 of NSPC marker nestin (NES), with a minority of cells expressing mature neuron marker calbindin  
117 (CALB) (**Figure 1G**). Cells were plated at equal density and pulsed with cell division marker 5-ethynyl-  
118 2'-deoxyuridine (EdU), then quantified by confocal microscopy. Compared to wild-type, *Kmt2d*<sup>+/ $\beta$ geo</sup>  
119 NSPCs demonstrated lower proliferation rates as measured by EdU incorporation and cell density  
120 (**Figure 1H**).

121 Findings of proliferation defects, G<sub>2</sub>/M cell cycle delay, and increased apoptosis in  
122 hippocampal cells bearing *Kmt2d* inactivation by SET domain deletion, together with proliferation  
123 defects in primary *Kmt2d*<sup>+/ $\beta$ geo</sup> hippocampal NSPCs, support a cell-intrinsic role for KMT2D activity in  
124 neurodevelopmental contexts.

125

## 126 **Suppressed transcription of KMT2D-regulated hypoxia response genes upon loss of the KMT2D** 127 **SET methyltransferase domain**

128 We performed high-coverage RNA-seq comparing three *Kmt2d* <sup>$\Delta$ / $\Delta$</sup>  clones against the parental  
129 *Kmt2d*<sup>+/ $+$</sup>  line, each in technical triplicate, followed by differential expression analysis. Libraries  
130 clustered robustly by genotype with clear separation of *Kmt2d* <sup>$\Delta$ / $\Delta$</sup>  cells from *Kmt2d*<sup>+/ $+$</sup>  by Principal  
131 Component Analysis (PCA), yielding 575 significant differentially-expressed genes (DEGs) at a False  
132 Discovery Rate (FDR) of 0.05 in *Kmt2d* <sup>$\Delta$ / $\Delta$</sup>  cells compared to *Kmt2d*<sup>+/ $+$</sup>  (**Figure 2A, Supplementary**  
133 **Figure 2A-B, Supplementary Table 1**). ~76% of DEGs (436 genes) were downregulated in *Kmt2d* <sup>$\Delta$ / $\Delta$</sup>   
134 cells, including known KMT2D targets such as Krueppel-like factor 10 (*Klf10*) (12), revealing strong  
135 global transcriptional suppression from *Kmt2d* inactivation. Overrepresentation analysis (ORA)  
136 revealed significant enrichment of gene networks among *Kmt2d* <sup>$\Delta$ / $\Delta$</sup>  down DEGs, including glycolysis  
137 and hypoxia-inducible factor 1A (HIF1A) signaling, while *Kmt2d* <sup>$\Delta$ / $\Delta$</sup>  upregulated DEGs were enriched in  
138 fewer networks (**Figure 2B**).

139 We reasoned that among *Kmt2d* <sup>$\Delta$ / $\Delta$</sup>  DEGs, a subset of genes found to also bind KMT2D itself in  
140 wild-type cells would more likely represent direct transcriptional consequences of *Kmt2d* inactivation,  
141 whereas non-bound DEGs could reflect secondary effects. We performed chromatin  
142 immunoprecipitation followed by high-throughput sequencing (ChIP-seq) using a previously validated  
143 ChIP-grade KMT2D antibody (9) in *Kmt2d*<sup>+/ $+$</sup>  HT22 cells. We identified 3,756 KMT2D binding peaks

144 significantly enriched over input (**Supplementary Table 2**), of which ~10% occur inside promoters,  
145 ~33% (1,235 peaks) occur within 5 kb of a transcription start site (TSS±5kb), and ~25% occur within 2  
146 kb (**Supplementary Figure 2C-F**). To account for promoter and enhancer interactions (9, 10, 23), we  
147 reasoned that TSS±5kb peaks, compared to more distal peaks, are more likely to reflect KMT2D cis-  
148 regulatory functions on proximal genes, so we refer to these as KMT2D-bound genes. The 1,463  
149 observed KMT2D-bound genes (**Supplementary Table 3**) were significantly enriched in mRNA 3'UTR  
150 binding, rho GTPase signaling, circadian clock, translation, oxidative stress, HIF1A signaling, and  
151 other pathways (**Supplementary Figure 2G**).

152 We then intersected KMT2D-bound genes with *Kmt2d*<sup>ΔΔ</sup> DEGs to reveal 74 putative direct  
153 target genes (**Supplementary Table 3**), of which ~85% (63 genes) were downregulated (**Figure 2C**),  
154 including insulin-like growth factor 1 (*Igf1*), and fos-like antigen 2 (*Fosl2*). At least 20 observed KMT2D-  
155 bound, *Kmt2d*<sup>ΔΔ</sup> DEGs were previously described as KMT2D targets in other tissues (7, 24). KMT2D-  
156 bound, *Kmt2d*<sup>ΔΔ</sup> down-DEGs were most significantly enriched for pathways including face  
157 morphogenesis, glycolysis, hypoxia response, and proliferation, and surprisingly, 29 of these 63 genes  
158 are also HIF1A-regulated (25). Although craniofacial features associate with KS1, enrichment of face  
159 morphogenesis genes in HT22 cells likely reflects pleiotropic gene functions. KMT2D ChIP-seq peaks  
160 on HIF1A-regulated genes clustered at promoters and enhancers, often overlapping CpG islands in  
161 genes such as *Fosl2*, with others clustering at alternative TSSs, as in retinoic acid receptor alpha  
162 (*Rara*), or in enhancer-like peaks, as in DNA-damage-inducible transcript 4 (*Ddit4*) (**Figure 2D**,  
163 **Supplementary Figure 2H**).

164 A large fraction of KMT2D-bound, *Kmt2d*<sup>ΔΔ</sup> DEGs control oxygen-responsive metabolism,  
165 warranting interrogation of shared KMT2D and HIF1A binding sites. We first intersected KMT2D  
166 peaks with HIF1A peaks previously found in embryonic heart (26), finding 423 overlapped regions  
167 (**Figure 2E**). Like KMT2D, HIF1A showed ~10% of peaks located inside promoters, but among shared  
168 KMT2D/HIF1A-bound peaks this fraction approached ~40%, supporting cooperative regulatory  
169 activity (**Supplementary Figure 2I**). We identified 289 TSS±5kb genes, as defined above, for these  
170 overlapped KMT2D/HIF1A-bound peaks, including 8 *Kmt2d*<sup>ΔΔ</sup> DEGs (**Supplementary Table 3**). To  
171 check if KMT2D/HIF1A-bound genes generalize to other tissues we next interrogated independent  
172 gene sets having experimentally validated, hypoxia-induced HIF1A binding in the promoter (27). Of 86  
173 validated genes, 5 were KMT2D-bound, *Kmt2d*<sup>ΔΔ</sup> down-DEGs, 23.3-fold more than expected by  
174 chance (Fisher's Exact Test, p=4.74e-6) (**Supplementary Table 3**). Of 81 genes validated in three or

175 more tissues, 3 were KMT2D-bound, *Kmt2d*<sup>Δ/Δ</sup> down-DEGs: *Klf10*, *Rara*, and *Ddit4* (Fisher's Exact  
176 Test, p=0.002).

177 Given the prevalence of oxygen response genes among *Kmt2d*<sup>Δ/Δ</sup> down-DEGs and shared  
178 KMT2D/HIF1A targets, we hypothesized a positive regulatory role for KMT2D in transcriptional  
179 responses to hypoxia in HT22 cells. We subjected *Kmt2d*<sup>+/+</sup>, *Kmt2d*<sup>+/-</sup>, and *Kmt2d*<sup>Δ/Δ</sup> cells to normoxia  
180 (21% O<sub>2</sub>) or hypoxia (1% O<sub>2</sub>), and measured hypoxia-induced gene expression responses. Analysis of  
181 canonical HIF1A targets, vascular endothelial growth factor A (*Vegfa*), Bcl2/adenovirus E1B 19-KD  
182 protein-interacting protein 3 (*Bnip3*), DNA-damage-inducible transcript 3 (*Ddit3*), and cyclin-dependent  
183 kinase inhibitor 1A (*Cdkn1A*), in *Kmt2d*<sup>+/+</sup> cells revealed robust upregulations upon hypoxic exposure;  
184 in contrast, *Kmt2d*<sup>+/-</sup> and *Kmt2d*<sup>Δ/Δ</sup> cell lines failed to induce these genes to comparable levels (**Figure**  
185 **2F, Supplementary Figure 2J**). In hypoxic conditions, stabilized HIF1A undergoes nuclear  
186 translocation, i.e. activation. We therefore quantified nucleus-localized HIF1A fluorescence under  
187 normoxia (21% O<sub>2</sub>) and hypoxia (1% O<sub>2</sub>) (**Supplementary Figure 2K**). Unexpectedly, in normoxia,  
188 *Kmt2d*<sup>Δ/Δ</sup> cells exhibited >2-fold greater HIF1A activation than *Kmt2d*<sup>+/+</sup> cells. Upon hypoxic exposure,  
189 HIF1A activation doubled in wild-type cells, but failed to respond in *Kmt2d*<sup>+/-</sup> cells and *Kmt2d*<sup>Δ/Δ</sup> cells.

190 Taken together, our data suggest that KMT2D plays an important role in positively regulating  
191 HIF1A-inducible, oxygen-responsive metabolic gene programs in neuronal cells.

192

### 193 **KS1 patient-derived cells recapitulate KMT2D-associated defects in proliferation and cell cycle**

194 We reprogrammed skin biopsy fibroblasts to generate induced pluripotent stem cells (iPSCs)  
195 from a previously described female KS1 patient bearing a heterozygous nonsense *KMT2D* mutation  
196 (c.7903C>T:p.R2635\*) with characteristic facial features, congenital heart disease, and visuospatial  
197 memory impairments (28). We selected KS1 iPSCs (KS1-1) bearing normal 46, XX karyotype  
198 (**Supplementary Figure 3A**) and characteristic morphology (**Figure 3A**) for comparison against  
199 previously described iPSC lines from unrelated healthy controls (C1-2, C3-1) (29). *KMT2D* mRNA  
200 quantification in KS1 iPSCs confirmed decreased message compared to controls, as expected due to  
201 haploinsufficiency (**Supplementary Figure 3B-C**). Quantification after EdU pulse demonstrated lower  
202 proliferation rates (~25%) in KS1 iPSCs compared to controls (**Figure 3B**), accompanied by a shift in  
203 cell cycle occupancy (**Figure 3C, Supplementary Figure 3D**) favoring G<sub>2</sub>/M phase (24% more cells).

204 We next generated NES-expressing NSPCs through parallel differentiation of KS1 and control  
205 iPSCs, using an established small molecule inhibition protocol (30). RT-qPCR confirmed decreased  
206 *KMT2D* in KS1 NSPCs (**Supplementary Figure 3E**), and cells displayed normal morphology

207 independent of genotype (**Figure 3D, Supplementary Figure 3F**). EdU incorporation rates revealed  
208 KS1 NSPCs had a marked proliferation defect (~47% reduced, **Figure 3E**) and fewer mitotic divisions  
209 (**Supplementary Figure 3G**). KS1 NSPCs did not display a cell cycle defect (**Figure 3F,**  
210 **Supplementary Figure 3H**), suggesting either cell-type dependence or loss of this phenotype during  
211 in vitro differentiation. Flow cytometry indicated higher proportions of dying cells in KS1 samples  
212 compared to controls among both iPSCs (~130%) and NSPCs (~115%) (**Figure 3G, Supplementary**  
213 **Figure 3I-J**).

214 To determine whether G<sub>2</sub>/M bias, seen in KS1 iPSCs, occurred in unmanipulated primary cells  
215 from additional KS1 patients, we analyzed fibroblasts from three molecularly confirmed KS1 patients  
216 (KS1-1, KS1-2, KS1-3) and healthy controls. Fibroblasts were synchronized in G<sub>2</sub>/M phase followed by  
217 flow cytometric analysis of DNA content. At 3 hours post-release, control cells had exited G<sub>2</sub>/M phase,  
218 in contrast to KS1 cells which remained in G<sub>2</sub>/M (**Figure 3H**). Thus, delayed G<sub>2</sub>/M exit was consistent  
219 in primary, non-reprogrammed cells from three KS1 patients.

220

## 221 **Transcriptional suppression of metabolic genes in cycling cells, and precocious neuronal** 222 **differentiation in KS1 patient-derived NSPCs**

223 To interrogate transcriptional consequences of *KMT2D* loss in the context of neuronal  
224 differentiation, we performed single-cell RNA sequencing (scRNA-seq) in iPSCs and NSPCs from the  
225 KS1 patient and controls (**Supplementary Figure 4A**). By inspecting expression of cell-type markers,  
226 we confirmed that libraries segregated into clusters reflecting distinct cell identities of the expected  
227 lineages (**Supplementary Figure 4B-D**).

228 First, differential expression analysis in iPSCs and NSPCs identified genes downregulated or  
229 upregulated in KS1 patient relative to healthy controls (**Supplementary Figure 4E**). KS1 iPSCs  
230 displayed strong transcriptional suppression among 421 DEGs, with 372 genes down and 49 genes  
231 up (**Supplementary Table 4**). NSPCs showed less directional bias, having 346 significant DEGs  
232 among which 147 genes were down and 199 genes were up (**Supplementary Table 5**). Intersection of  
233 KS1 iPSC and NSPC DEG lists showed that 40 genes were shared down and 10 genes were shared  
234 up (**Supplementary Figure 4F-G, Supplementary Table 6**). Shared down genes included glycolysis  
235 genes, aldehyde dehydrogenase 7 family member A1 (*ALDH7A1*), enolase 1 (*ENO1*), and  
236 triosephosphate isomerase 1 (*TPI1*), as well as factors important to stem cell maintenance including  
237 proliferation-associated protein 2G4 (*PA2G4*) and protein lin-28 homolog A (*LIN28A*). As in *Kmt2d*<sup>Δ/Δ</sup>  
238 HT22 cells, downregulated genes in KS1 patient iPSCs and NSPCs were significantly enriched for



239 HIF1A direct targets, genes containing the hypoxia-responsive element (HRE) 5'-RCGTG-3' motif, and  
240 known hypoxia response genes (**Supplementary Figure 4H**).

241 We next focused on NSPCs from KS1 and controls to interrogate transcriptional effects during  
242 neuronal differentiation. We used Uniform Manifold Approximation and Projection (UMAP) to visualize  
243 single cells in a manner that displays high-dimensionality data while preserving both local and global  
244 relationships (31). Control NSPCs were tightly clustered, indicating similar expression profiles, in  
245 contrast to a distinct separation of KS1 cells which gradually lessens in a subset (top) of cells that  
246 more closely resemble controls (**Figure 4A**). We then partitioned single-cell libraries into  
247 developmentally informative subsets as follows. First, we verified that differences in cell cycle phase  
248 composition do not account for KS1-associated differential gene expression in NSPCs  
249 (**Supplementary Figure 5A, Supplementary Table 7**). Next, we partitioned cells by stage-specific  
250 marker expression to define a differentiation trajectory consisting of early or “cycling” NSPCs,  
251 “transitioning” NSPCs, and “differentiating” NSPCs (**Figure 4B**). Cycling cells comprised the majority  
252 of NSPCs analyzed and exhibited the greatest KS1-associated expression differences, while  
253 expression profiles of transitioning and differentiating NSPCs show gradual convergence of gene  
254 expression. We analyzed DEGs exclusively within cycling, transitioning, and differentiating NSPC  
255 subsets to determine if particular gene networks drive transcriptional differences in a stage-specific  
256 manner (**Figure 4C, Supplementary Table 7**). KS1 DEGs in transitioning NSPCs, and to a lesser  
257 extent cycling NSPCs, showed enrichment of genes comprising the Notch signaling pathway including  
258 delta-like protein 3 (*DLL3*), protein jagged-1 (*JAG1*), transcription factor HES-5 (*HES5*), and cyclin D1  
259 (*CCND1*). Cycling NSPCs had DEGs enriched in glycolysis pathways.

260 Apart from increased rates of KS1 cell death (**Figure 3G**), another possible factor in the  
261 observed decrease of proliferative KS1 NSPCs (**Figure 3E**) could be a change in cellular  
262 differentiation, such as precocious cell maturation, resulting in depletion of cycling precursors. To  
263 explore this by scRNA-seq, we examined markers ranging from immature cells (*PAX6*<sup>+</sup>) to the most  
264 differentiated cells (*MAP2*<sup>+</sup>) (**Figure 4D-E**). We further restricted analysis to the transitioning and  
265 differentiating, i.e. “maturing” NSPC subset (**Supplementary Figure 5B**), defining a trajectory that  
266 enabled parsing of cells into binned deciles of increasing maturation (**Supplementary Figure 5C-H**).  
267 Quantification of cell densities revealed strong bias of KS1 NSPCs in the most matured bins relative to  
268 controls (**Figure 4F**), i.e. greater representation of mature NSPCs from KS1 than controls. These  
269 transcriptional signatures were corroborated experimentally at protein level, finding KS1 NSPCs had

270 increased MAP2 fluorescence and decreased PAX6 fluorescence relative to control using flow  
271 cytometry (**Figure 4G-H**).

272 Together, these results link transcriptional suppression of metabolic gene pathways to cell-  
273 autonomous proliferation defects in *KMT2D*-deficient KS1 patient-derived stem cell models, and  
274 scRNA-seq data suggest that precocious differentiation could contribute to KS1-associated  
275 neurodevelopmental defects.

276

### 277 **In vivo defects of neurogenesis and NSPC differentiation in a *Kmt2d*<sup>+/ $\beta$ geo</sup> mouse model of KS1**

278 Finally, we asked whether proliferative defects, transcriptional suppression, and precocious  
279 differentiation phenotypes validate in vivo, using an established KS1 mouse model. *Kmt2d*<sup>+/ $\beta$ geo</sup> mice,  
280 bearing a *Kmt2d* truncating mutation, were previously found to exhibit visuospatial memory  
281 impairments and fewer doublecortin (DCX<sup>+</sup>) NSPCs in the DG subgranular zone (SGZ) (12, 32), but  
282 NSPC lineage progression in *Kmt2d*<sup>+/ $\beta$ geo</sup> mice has not been characterized.

283 We conducted cell cycle and RNA-seq analysis in *Kmt2d*<sup>+/ $\beta$ geo</sup> mice, using an EdU pulse  
284 paradigm to label adult-born cells. We sampled micro-dissected DG within 1 cell cycle (16 hours) to  
285 capture the full complement of dividing NSPCs (**Figure 5A**), then purified EdU<sup>+</sup> nuclei by fluorescence-  
286 activated cell sorting (FACS) (**Figure 5B, Supplementary Figure 6A**). DNA content analysis revealed  
287 enrichment of G<sub>2</sub>/M phase in *Kmt2d*<sup>+/ $\beta$ geo</sup> EdU<sup>+</sup> DG nuclei (**Figure 5C**). We next profiled transcription by  
288 RNA-seq in purified EdU<sup>+</sup> DG nuclei, yielding 827 DEGs (**Supplementary Figure 6B-C**,  
289 **Supplementary Table 8**). The 416 down-regulated genes in *Kmt2d*<sup>+/ $\beta$ geo</sup> nuclei were enriched for  
290 misfolded protein binding, TCA cycle, proteasome complex, oxygen response, and poly(A) RNA-  
291 binding genes. Given the observed downregulation of poly(A) RNA-binding genes, we considered the  
292 possibility that improper 3'UTR-mediated mRNA metabolism could lead to accumulation of transcripts  
293 influencing NSPC maturation. Indeed, despite little overall bias toward up or downregulation in  
294 *Kmt2d*<sup>+/ $\beta$ geo</sup> DG nuclei, interrogating positive regulators of neuronal differentiation revealed a marked  
295 predominance of pro-neural transcripts upregulated, having only 3 genes down but 14 genes up,  
296 including copine-1 (*Cpne1*), focal adhesion kinase 1 (*Ptk2*), ras-related protein RAB11A (*Rab11A*), and  
297 retinoblastoma-associated protein 1 (*Rb1*). Interestingly, KS1 patient NSPCs also showed upregulated  
298 pro-neural genes such as nuclear receptor subfamily 2, group F, member 1 (*NR2F1*) and pro-neural  
299 transcription factor HES-1 (*HES1*), while *Kmt2d* <sup>$\Delta/\Delta$</sup>  HT22 cells had upregulated brain-derived  
300 neurotrophic factor (*Bdnf*) and neuron-specific microtubule component (*Tubb3/Tuj1*). Such pro-neural  
301 gene expression observed across KS1 models raises the possibility that NSPC differentiation rates  
302 could be altered in *Kmt2d*<sup>+/ $\beta$ geo</sup> mice.

303 To examine NSPC lineage progression in vivo, we analyzed stage-specific cell abundances  
304 both at steady-state and after birth-dating of adult-born NSPCs by EdU pulse, comparing *Kmt2d*<sup>+/ $\beta$ geo</sup>  
305 mice to sex- and age-matched *Kmt2d*<sup>+/+</sup> littermates (**Figure 5D, Supplementary Figure 6D**).

306 At steady-state, we observed significantly fewer NSPCs in *Kmt2d*<sup>+/ $\beta$ geo</sup> mice compared to  
307 *Kmt2d*<sup>+/+</sup> mice at all stages (**Figure 5E**). The cell division marker, minichromosome maintenance  
308 complex component 2 (MCM2), distinguished NES<sup>+</sup> NSPCs in the quiescent (MCM2<sup>-</sup>) or activated  
309 (MCM2<sup>+</sup>) state. Importantly, quiescent radial glia-like (qRGL, NES<sup>+</sup>MCM2<sup>-</sup>) NSPCs were ~39% less  
310 numerous in *Kmt2d*<sup>+/ $\beta$ geo</sup> mice, indicating a baseline paucity in the stem cell pool. Activated RGL  
311 (aRGL, NES<sup>+</sup>MCM2<sup>+</sup>) NSPCs were ~43% less numerous, and intermediate progenitor cell (IPC, NES<sup>-</sup>  
312 MCM2<sup>+</sup>) NSPCs were ~26% fewer. We confirmed prior observations (12, 32) of fewer neuroblast (NB,  
313 DCX<sup>+</sup>) NSPCs, finding a 28% decrease in *Kmt2d*<sup>+/ $\beta$ geo</sup> mice. By stratifying analysis along the  
314 septotemporal axis of the DG, we observed that aRGL NSPC reductions in *Kmt2d*<sup>+/ $\beta$ geo</sup> mice were  
315 more pronounced in the septal DG than the temporal region (**Supplementary Figure 6E**), congruous  
316 with spatial memory defects (12) localized to the septal DG (33). Because DCX<sup>+</sup> NSPCs migrate  
317 radially during maturation, we compared radial distances of DCX<sup>+</sup> cell bodies from the SGZ plane and  
318 observed increased distances in *Kmt2d*<sup>+/ $\beta$ geo</sup> mice (**Supplementary Figure 6F**). Finally, despite  
319 diminished NSPC populations in *Kmt2d*<sup>+/ $\beta$ geo</sup> mice, we observed no numeric differences among mature  
320 neurons (RBFOX3<sup>+</sup>) (**Supplementary Figure 6G**), nor were gross anatomical differences seen by MRI  
321 volumetric analysis (**Supplementary Figure 6H, Supplementary Table 9**).

322 From these data, we then calculated a lineage progression index to approximate the expansion  
323 potential of each successive neurogenic cell type. Although *Kmt2d*<sup>+/ $\beta$ geo</sup> mice showed fewer total  
324 NSPCs of each type at steady-state, the lineage progression index at each cell-type transition did not  
325 differ significantly (**Supplementary Figure 6I**), suggesting that particular cell-type transition  
326 impairments are not responsible for the adult neurogenesis defect. However, we did note substantially  
327 higher variance of RGL activation rates in *Kmt2d*<sup>+/ $\beta$ geo</sup> mice, suggesting impaired coordination of NSPC  
328 mitotic entry (**Supplementary Figure 6J**).

329 Pulse-labeling with marker-based imaging enables precise measurement of birth dates, i.e.  
330 mitotic division, of specific cell types. To resolve temporal dynamics of NSPC differentiation in  
331 *Kmt2d*<sup>+/ $\beta$ geo</sup> and wild-type mice, we pulsed adult mice with EdU for a period of 2 weeks, during which a  
332 subset of labeled DG cells is expected to reach a late NSPC (NB) stage, characterized by radial  
333 extension of a DCX<sup>+</sup> neuronal process. In contrast, another subset of pulsed cells, bearing a NES<sup>+</sup>  
334 qRGL-like process, represents NSPCs that remain in a stem-like state. Thus, by quantifying EdU-  
335 labeled cells exhibiting either a DCX<sup>+</sup> neuronal process (EdU<sup>+</sup>DCX<sup>+</sup>) or a NES<sup>+</sup> qRGL-like process

336 (EdU<sup>+</sup>NES<sup>+</sup>) (**Figure 5F, Supplementary Figure 7A**), one can compare relative differentiation status,  
337 where a higher proportion of EdU<sup>+</sup>DCX<sup>+</sup> cells would indicate early or precocious maturation. Indeed,  
338 though steady-state cell numbers again confirmed fewer total NES<sup>+</sup> and DCX<sup>+</sup> NSPCs in *Kmt2d*<sup>+/ $\beta$ geo</sup>  
339 mice compared to wild-types, among pulsed cells the *Kmt2d*<sup>+/ $\beta$ geo</sup> mice exhibited a significantly greater  
340 fraction of EdU<sup>+</sup>DCX<sup>+</sup> immature neurons (**Figure 5F**). In other words, *Kmt2d*<sup>+/ $\beta$ geo</sup> DG NSPCs born  
341 within the preceding 2 weeks had achieved a more advanced differentiation state than wild-type cells  
342 born in the same window.

343 Together, studies of adult neurogenesis dynamics in *Kmt2d*<sup>+/ $\beta$ geo</sup> mice suggest that in vivo  
344 neurodevelopmental effects of KMT2D loss recapitulate many phenotypes observed initially in vitro  
345 using mouse HT22 cells and KS1 human-derived cells. While comparison of gene expression profiles  
346 across these KS1 models revealed few individual genes with shared dysregulation among all models,  
347 at network level we observed high enrichment of HIF1A regulatory and RNA metabolism pathways in a  
348 comparison of all DEGs in these KS1 models (**Supplementary Figure 8A-D**).

349

### 350 **Precocious differentiation and reduced hypoxia responses in *Kmt2d*<sup>+/ $\beta$ geo</sup> primary hippocampal** 351 **NSPCs**

352 Cellular oxygen availability has previously been directly linked to maintenance and  
353 differentiation of embryonic (33) and adult DG (19) NSPCs. Primary hippocampal NSPCs of *Kmt2d*<sup>+/ $\beta$ geo</sup>  
354 mice showed increased HIF1A activation compared to wild-type NSPCs, and both genotypes showed  
355 increased HIF1A activation upon treatment by HIF1A-stabilizing agent dimethylxaloylglycine (DMOG)  
356 for 12 hours (**Supplementary Figure 9A**). We then subjected NSPCs to a standard in vitro neuronal  
357 differentiation protocol, quantifying cell marker expression between 0-8 days (**Supplementary Figure**  
358 **10A-B**). Prior to differentiation (day 0), wild-type NSPCs expressed low levels of a mature DG neuron  
359 marker, prospero-related homeobox 1 (PROX1), while *Kmt2d*<sup>+/ $\beta$ geo</sup> NSPCs surprisingly showed an  
360 increase (**Supplementary Figure 10C**). By measuring expression of a pro-neural transcription factor,  
361 achaete-scute homolog 1 (ASCL1), we observed a baseline decrease (day 0) in *Kmt2d*<sup>+/ $\beta$ geo</sup> NSPCs  
362 compared to wild-type (**Supplementary Figure 10D**). In contrast, after 2 days in differentiation  
363 conditions, *Kmt2d*<sup>+/ $\beta$ geo</sup> NSPCs responded with greater ASCL1 expression compared to wild-types, an  
364 effect sustained at 4 and 8 days. DMOG treatment increased ASCL1 levels in both genotypes, though  
365 to greater magnitude in wild-type than *Kmt2d*<sup>+/ $\beta$ geo</sup> NSPCs. Together, these data are consistent with a  
366 link between cellular hypoxia response and neuronal differentiation in hippocampal NSPCs (20).

367

## 368 Discussion

369 The ID disorder KS1 is caused by mutations in the histone methyltransferase *KMT2D*, but  
370 mechanistic links to neurodevelopmental and cognitive consequences in patients are not yet clear.  
371 KS1 diagnoses are typically made after childbirth, but the inherent reversibility of chromatin  
372 modifications raises the possibility that a detailed understanding of *KMT2D* activity in neuronal cells  
373 could identify molecular targets for postnatal interventions in KS1-associated ID.

374 Here, we report that *KMT2D*-deficient human and mouse neurodevelopment models, in vitro  
375 and in vivo, demonstrate similar patterns of transcriptional suppression, proliferative defects, and  
376 precocious cellular differentiation. These phenotypes were cell-autonomous in vitro, suggesting that 1)  
377 chromatin and gene expression studies in neurogenic cell types could yield disease-relevant *KMT2D*  
378 targets and 2) these cellular models provide platforms for screening of novel therapeutic strategies or  
379 targeted manipulations. We performed transcriptomic and *KMT2D* profiling in these models and  
380 observed systematic suppression of hypoxia response pathways, particularly among HIF1A-regulated  
381 genes that are also directly *KMT2D*-bound in neuronal cells. Physically overlapping *KMT2D*- and  
382 HIF1A-bound genomic loci were observed across tissues, ~40% of these at promoters, raising the  
383 possibility of shared etiologies in embryonically distinct KS1-affected organ systems. Furthermore,  
384 *KMT2D*-deficient neuronal cells, in contrast to isogenic wild-type cells, were unable to mount  
385 characteristic hypoxia-inducible gene activation responses when exposed to low-oxygen conditions,  
386 demonstrating oxygen response defects in KS1 models.

387 The implication of hypoxia response defects in KS1 suggests clinical relevance of recent  
388 findings in neurodevelopmental regulation. First, the adult hippocampal NSPC niche harbors locally  
389 hypoxic, but dynamic, microenvironments and the hypoxic state positively influences NSPC survival  
390 (20, 21). Thus, compromised hypoxia responses could render cells particularly vulnerable to changes  
391 in oxygen levels as experienced by maturing NSPCs as they migrate from DG SGZ vasculature.  
392 Second, NSPC maturation is coupled to a metabolic rewiring from glycolysis in early NSPCs, to  
393 oxidative phosphorylation in maturing neurons. Zheng and colleagues (19) recently found this  
394 metabolic switch, marked by suppression of glycolytic genes, to be essential for neuronal maturation.  
395 In KS1 neural models we observed suppression of hypoxia-responsive glycolytic genes accompanied  
396 by upregulation of pro-neuronal differentiation genes, and demonstrated precocious maturation of DG  
397 NSPCs by in vivo pulsing of adult *Kmt2d*<sup>+/ $\beta$ geo</sup> mice, as well as in vitro differentiation of *Kmt2d*<sup>+/ $\beta$ geo</sup>  
398 primary DG NSPCs. Future studies could determine whether targeted chromatin opening at hypoxia  
399 response loci normalizes differentiation dynamics in KS1 NSPCs.

400 Analogous findings regarding premature activation of terminal differentiation genes, reduced  
401 proliferation, and precocious maturation in KMT2D-depleted keratinocytes were recently linked to  
402 disorganized epidermal stratification (10). Furthermore, in KMT2D-deficient cardiomyocytes, loss of  
403 H3K4me2 at KMT2D-bound hypoxia response genes associated with cell cycle and proliferative  
404 defects in heart development (6). In contrast, KMT2D deletion in B cells conferred proliferative  
405 advantage and impaired cell maturation, despite significant up-regulation of differentiation genes (8,  
406 9). Thus, while KMT2D's role in enhancer-mediated gene expression during differentiation is well-  
407 established (11), phenotypic manifestations appear cell type- and stage-dependent. We now extend  
408 KMT2D-associated phenotypes of transcriptional perturbation, hypoxia response, cell cycle,  
409 proliferation, and premature differentiation to neuronal contexts. Phenotypic concordance across  
410 tissues of disparate embryonic origin suggests that KMT2D targets important to KS1 phenotypes  
411 support basic cellular homeostatic functions related to housekeeping, energy production, and cell  
412 cycle progression, rather than genes with purely brain-specific function. Furthermore, we report  
413 concordant phenotypes both from nonsense *KMT2D* mutations (patient iPSCs and NSPCs), and  
414 mutations limited to the KMT2D SET domain (HT22 cells, *Kmt2d*<sup>+/ $\beta$ geo</sup> mice), indicating that loss of  
415 either gene dosage or catalytic function of KMT2D can be pathogenic.

416 Present results indicate that adult hippocampal neurogenesis defects, which we previously  
417 found to associate with visuospatial memory defects in *Kmt2d*<sup>+/ $\beta$ geo</sup> mice, are observable at all stages  
418 examined, including fewer quiescent NSPCs in the DG which could indicate either post-natal depletion  
419 or altered niche development in the embryo. Despite having fewer total NSPCs, by pulse-chase  
420 experiments we observed the *Kmt2d*<sup>+/ $\beta$ geo</sup> NSPC population to achieve a more advanced maturation  
421 stage than that of wild-type littermates. Interestingly, adult-born NSPCs wield a disproportionately  
422 strong influence on DG circuitry and visuospatial learning during younger, but not older, neuronal  
423 maturation stages (34). This stage-dependent coupling of NSPC maturation with cognitive outcomes  
424 increases the likelihood that accelerated neuronal differentiation rates could negatively impact  
425 visuospatial memory acquisition. Furthermore, multispecies comparisons demonstrate that measured  
426 decreases in neurogenesis rates are consistent with accelerated neuronal maturation rates across the  
427 lifespan (35).

428 The apparent paradox of increased HIF1A activation, despite blunted hypoxia-responsive  
429 expression in *Kmt2d*<sup>+/ $\Delta$</sup>  and *Kmt2d* <sup>$\Delta$ / $\Delta$</sup>  neuronal cells raises two possibilities. First, chronic HIF1A activity  
430 could result in cellular compensatory efforts to downregulate hypoxia response genes. In this case,  
431 heterochromatin environments at HIF1A-binding genes could prevent induction. Alternatively, cellular  
432 oxygen sensing could be coupled to gene expression through chromatin states in a HIF1A-

433 independent manner. Independent studies recently discovered direct oxygen sensing by KDM6A/UTX  
434 (the H3K27 demethylase lost in KS2 patients) as well as the H3K4/H3K36 demethylase 5A (KDM5A),  
435 which controlled chromatin states and cell differentiation in a HIF1A-independent manner (36, 37).  
436 These findings link hypoxia-induced histone methylation at H3K4, H3K27, H3K9, and H3K36 directly  
437 with control of maturation in multiple cell types, further supporting the notion that KS-associated  
438 transcriptional suppression, in the adult DG context, could impact NSPC stage-dependent learning  
439 (34) via metabolic dysregulation. Hypoxia-upregulated H3K4me3 peaks (37) were enriched in HIF1A  
440 target gene promoters, where we presently observed high overlaps in KMT2D/HIF1A-bound loci.  
441 Strikingly, loss of KDM5A, whose activity opposes that of KMT2D at H3K4 sites, caused upregulation  
442 of hypoxia-responsive genes (37), i.e. an effect opposite to the present KS1-associated suppression of  
443 hypoxia response genes such as *Klf10* and *Bnip3l*. Several histone demethylases, and at least 33  
444 chromatin modifiers in total, have been shown to impact hypoxia response genes, 11 of these  
445 associating with developmental disorders or cancers, yet KMT2D and other histone  
446 methyltransferases had not yet been implicated (38).

447 In summary, our findings suggest that KMT2D deficiency disrupts neurogenesis by negatively  
448 impacting NSPC maintenance functions including cell cycle, proliferation, and survival, accompanied  
449 by decreased adult NSPC numbers and precocious neuronal differentiation. Chromatin and  
450 transcriptome profiling identified KMT2D- and HIF1A-regulated gene programs suppressed across  
451 KS1 model systems, implicating previously described roles for hypoxia responses in regulating  
452 neuronal differentiation. Indeed, we functionally demonstrate KMT2D-dependent HIF1A activation and  
453 target gene induction in KS1 neural models, and diminished response to hypoxic conditions during in  
454 vitro neuronal differentiation in *Kmt2d*<sup>H<sup>+</sup>/βgeo</sup> NSPCs. Together, these findings are consistent with an  
455 etiological model for KS1-associated developmental changes in which KMT2D loss transcriptionally  
456 suppresses oxygen response programs critical to early NSPC maintenance, favoring precocious  
457 cellular differentiation during hippocampal neurogenesis.

458

## 459 **Methods**

460 Media and reagents are listed (**Supplementary Table 10**).

461

## 462 **Animals**

463 The *Kmt2d*<sup>+/ $\beta$ geo</sup> allele (Mll2Gt(RRt024)Byg) was generated by Bay Genomics (University of  
464 California) through the random insertion of a gene trap vector. *Kmt2d*<sup>+/ $\beta$ geo</sup> mice were fully backcrossed  
465 to C57Bl/6J background (JAX) over more than 10 generations. Animals were housed in a 14-hour  
466 light/10-hour dark cycle with free access to food and water. Experiments compare age- and sex-  
467 matched littermates. Genotyping by PCR has been described (12).

468

## 469 **Primary hippocampal NSPCs**

470 Female C57Bl/6J mice (JAX) were mated to *Kmt2d*<sup>+/ $\beta$ geo</sup> males and sacrificed for embryo  
471 harvest at embryonic day 18. Micro-dissected DG from *Kmt2d*<sup>+/ $\beta$ geo</sup> and *Kmt2d*<sup>+/+</sup> littermate embryos  
472 was processed for NSPC isolation and in vitro differentiation as described (39).

473

## 474 **Patient-derived iPSCs, NSPCs, and fibroblasts**

475 Skin biopsy fibroblasts were cultured from molecularly confirmed KS1 patients (KS1-1, KS1-2,  
476 KS1-3). KS1-1 fibroblasts were reprogrammed using non-integrating Sendai virus vectors (CytoTune-  
477 iPS 2.0). 5 days post-induction, cells were transferred to mouse embryonic fibroblast (MEF) feeder  
478 plates in iPSC media. 21 days post-induction, high quality colonies were manually selected for  
479 propagation and karyotyping by G-banding. Generation of healthy control lines (C3-1 and C1-2) was  
480 previously described (29). Feeder MEFs from E13.5 CF-1 mice were mitotically inactivated by  
481 irradiation. iPSCs were enzymatically passaged every 4-8 days using collagenase. NSPCs were  
482 induced from iPSCs as previously described (30), briefly, by inhibiting glycogen synthase kinase 3  
483 (GSK3), transforming growth factor  $\beta$  (TGF- $\beta$ ),  $\gamma$ -secretase, and Notch signaling pathways using small  
484 molecules CHIR99021 (4  $\mu$ M), SB431542 (3  $\mu$ M), and Compound E (0.1  $\mu$ M), in the presence of hLIF  
485 (10 ng/ml) and ROCK inhibitor (5  $\mu$ M) for 7 days. NSPCs were split with Accutase and propagated in  
486 neural induction medium on a Matrigel.

487

## 488 **CRISPR-Cas9 deletions in HT22 cells**

489 HT22 mouse hippocampal cells are commercially available, but were a gift of the Goff  
490 Laboratory and maintained in HT22 media. sgRNAs targeting two loci spanning the *Kmt2d* SET  
491 domain-encoding region, with cut sites in exon 52 and either exon 54 (*Kmt2d* <sup>$\Delta$ 1</sup>) or intron 54 (*Kmt2d* <sup>$\Delta$ 2</sup>),



492 were integrated into Cas9 plasmid (pSpCas9BB-2A-puro v2.0 (PX459)) and delivered to cells at 20%  
493 confluency using Lipofectamine 2000 according to manufacturer protocol. After puromycin selection,  
494 mutant cells were identified by PCR (primers listed) and clonally expanded. Following Sanger  
495 sequencing, a subset of clones appearing heterozygous by PCR, but found to bear strand invasion,  
496 were removed from analyses.

497

#### 498 **RNA-seq in HT22 cells: library preparation**

499 Cells were plated at equal density and sampled at 60% confluency. Total RNA was isolated  
500 from three biological replicates of *Kmt2d*<sup>Δ/Δ</sup> clones and *Kmt2d*<sup>+/+</sup> parental cells using Direct-Zol RNA  
501 MicroPrep, and libraries were constructed in technical triplicate using NEBNext Poly(A) Magnetic  
502 Isolation Module and NEBNext Ultrall RNA Library Prep Kit for Illumina, with size selection by AMPure  
503 XP beads, according to manufacturer protocols. Library quantification and quality checks were done  
504 using KAPA Library Quantification Kit for Illumina, High Sensitivity DNA Kit on BioAnalyzer, and Qubit  
505 dsDNA HS Assay. Paired end 50 bp reads were obtained for pooled libraries using Illumina HiSeq  
506 2500.

507

#### 508 **RNA-seq in HT22 cells: data analysis**

509 We first obtained a fasta file with all mouse cDNA sequences  
510 ([Mus\\_musculus.GRCm38.cdna.all.fa.gz](http://Mus_musculus.GRCm38.cdna.all.fa.gz)) from Ensembl  
511 ([http://uswest.ensembl.org/Mus\\_musculus/Info/Index](http://uswest.ensembl.org/Mus_musculus/Info/Index), version 91, downloaded January 2018). Then,  
512 sequencing reads were pseudoaligned to this fasta file and transcript abundances were subsequently  
513 quantified, using Salmon (40). We then used the tximport R package (41) to convert the transcript  
514 abundances into normalized gene-level counts, by setting the “countsFromAbundance” parameter  
515 equal to “lengthScaledTPM”. Next, we used the edgeR (42, 43) and limma (44) R packages to log2  
516 transform these gene-level counts, and normalize each of the samples with the “voom” function using  
517 the effective library size (that is, the product of the library size and the normalization factors, the latter  
518 of which we computed with the “calcNormFactors” function provided in edgeR). Subsequently, we  
519 estimated the mean-variance relationship, and calculated weights for each observation. In order to  
520 account for the correlation between technical replicates of the same clone when performing the  
521 differential analysis, we fit a mixed linear model, using the function “duplicateCorrelation” from the  
522 statmod R package (45) to block on clone. The differential analysis was then performed using the  
523 limma R package. Differentially expressed genes were called with 0.05 as the cutoff for the False  
524 Discovery Rate (FDR).

525 When performing the principal component analysis, transcript abundances were first converted  
526 into gene-level counts using the tximport R package, with the “countsFromAbundance” parameter  
527 equal to “no”. Then, we applied a variance stabilizing transformation to these gene-level counts using  
528 the “vst” function from the DESeq2 R package (46), with the parameter “blind” set to “TRUE”, and  
529 subsequently estimated the principal components (without scaling the expression matrix) using the  
530 1000 most variable genes.

531

### 532 **scRNA-seq: library preparation**

533 NSPCs were induced in parallel from each iPSC line (KS1-1, C1-2, C3-1) under identical conditions,  
534 and passaged three times before sampling. iPSCs were detached from MEF feeders using  
535 collagenase (200 units/ml). iPSCs and NSPCs were dissociated to single-cell suspension using  
536 Accutase. Cell counts and viability were analyzed using Countess II. scRNA-seq libraries were created  
537 with Chromium Single Cell 3' Library & Gel Bead Kit v2 (10x Genomics) according to manufacturer  
538 protocol. Targeted cell recovery for each sample was 5,000 cells. Sufficient cDNA for library  
539 construction was achieved using 20 amplification cycles for iPSC libraries and 16 cycles for NSPC  
540 libraries. Sample indexing was achieved using 11 PCR cycles for iPSC libraries and 5 cycles for NSPC  
541 libraries. scRNA-seq libraries were sequenced using Illumina NextSeq 500.

542

### 543 **scRNA-seq: data analysis**

544 Sequencing output was processed through the Cell Ranger 2.1.0 preprocessing pipeline using default  
545 parameters with the exception of --expect-cells=5000 for `cellranger count` and --normalize=none for  
546 `cellranger aggr`. Reads were quantified against hg19 using the 10x reference genome and  
547 transcriptome builds (refdata-cellranger-GRCh38-1.2.0). The aggregated raw count matrix was then  
548 used as input for the Monocle2 single-cell RNAseq framework. Differential gene expression analysis  
549 was performed on all NSPCs and iPSCs with respect to genotype (KS1 patient vs healthy control) and  
550 was performed using the Monocle2 (47) likelihood ratio test (0.1% FDR, Monocle2 LRT, Benjamini-  
551 Hochberg corrected) with `num\_genes\_expressed` added as a nuisance parameter to both the full and  
552 reduced models. The directionality of the differential gene test was determined by calculating the  
553 mean gene expression across all KS1 patient-derived and healthy control cells respectively, evaluating  
554 the relative fold change. High-variance genes were selected as those with a positive residual to the  
555 estimated dispersion fit and a mean number of reads per cell  $\geq 0.0005$ . Cell cycle stage was  
556 determined by profiling cell cycle associated genes across all cells and assigning cell cycle state using  
557 the R/Bioconductor package scran (48). Dimensionality reduction and visualization was performed via

558 UMAP (31) on the  $\log_{10}(\text{counts} + 1)$  of the high variance genes in the NSPC dataset. The first 10  
559 principal components were used as input for UMAP using the default parameters of the R/CRAN  
560 package `umap`. Cells were assigned to clusters using Monocle2's implementation of the louvain  
561 community detection algorithm. Learned clusters were then aggregated by hand based on marker  
562 gene expression into three clusters ("Differentiating", "Transitioning", "Cycling"). Differential gene  
563 expression within clusters, and between genotypes was performed as described above. The  
564 "Differentiating" cluster was then segregated, and a smooth line was fitted using a linear regression.  
565 This line was determined to represent the direction of differentiation by examination of marker genes  
566 (**Supplementary Figure 5C-H**). The residuals of this fit were then plotted and deciles were calculated  
567 containing equal number of cells along the axis of differentiation. The number of cells in each decile  
568 was then counted with respect to genotype.

569

#### 570 **ChIP-seq: library preparation**

571 *Kmt2d*<sup>+/+</sup> HT22 cells were sampled at 70% confluency and processed for pull-down with ChIP-grade  
572 KMT2D antibody (Millipore Sigma) according to ENCODE guidelines. Sonicated, reverse-crosslinked  
573 chromatin served as input control. Briefly, ~300 million cells per cell line were crosslinked in 1%  
574 formaldehyde, quenched with 0.125 M glycine, and cell lysate supernatants were collected for  
575 immediate processing or snap-frozen for storage at -80°C. Nuclei (20 million/sample) were diluted in 1  
576 ml RIPA buffer were sonicated using Bioruptor for 6 cycles of 5 minutes (60 seconds on/30 seconds  
577 off) in ice-cold water bath. Supernatants containing sheared chromatin were pre-cleared with Protein  
578 A Dynabeads and incubated overnight at 4°C with 8 µg KMT2D antibody. ChIP DNA was recovered by  
579 Dynabead incubation (overnight at 4°C plus 6 hours at room temperature) before 6 sequential salt  
580 washes of increasing stringency, then eluted and reverse crosslinked overnight at 65°C. DNA was  
581 purified using DNA Clean and Concentrator (Zymo Research) and quantified using High Sensitivity  
582 DNA Kit on BioAnalyzer, and Qubit dsDNA HS Assay. DNA libraries were constructed using NEBNext  
583 Ultrall DNA Library Prep Kit for Illumina and quantified using KAPA Library Quantification Kit for  
584 Illumina. Paired end 75 bp reads were obtained for pooled libraries using Illumina HiSeq 2500.

585

#### 586 **ChIP-seq: data analysis**

587 Sequencing reads were aligned to the mouse reference genome (mm10) using Bowtie2 (49). Then,  
588 duplicate reads were removed with the function `MarkDuplicates` from Picard  
589 (<http://broadinstitute.github.io/picard/>). Peaks were subsequently called using MACS2 (50), with the  
590 "keep-dup" parameter equal to "all". After peak calling, we excluded all peaks that overlapped with

591 blacklisted regions provided by ENCODE (51). As a quality metric, using the resulting list of peaks, we  
592 computed the fraction of reads in peaks (frip) with the “featureCounts” function in the Rsubread  
593 package (52), with the “requireBothEndsMapped” parameter equal to “TRUE”, and the  
594 “countChimericFragments” and “countMultiMappingReads” parameters equal to FALSE. We found  
595 frip to be 2.9%, which is within the typically encountered range of values for a point-source factor (53).  
596 To identify genes likely to be regulated in *cis* by KMT2D, we first obtained the coordinates of 10kb  
597 regions centered around the TSS for each gene, using the “promoters” function from the  
598 EnsDb.Mmusculus.v79 R package (54), with the “filter” parameter equal to  
599 “TxBiotypeFilter(“protein\_coding”)”, and the “upstream” and “downstream” parameters both equal to  
600 5000. Subsequently, we selected those genes whose extended promoter (+/- 5kb from the TSS)  
601 overlapped with at least one KMT2D peak, using the “findOverlaps” function in the GenomicRanges R  
602 package (55).

603

#### 604 **Purification of EdU<sup>+</sup> nuclei**

605 Mice were given 150 mg/kg EdU by intraperitoneal injection and sampled after 16 hours. DG was  
606 micro-dissected in ice-cold PBS immediately following sacrifice by halothane inhalation. Total nuclei  
607 were purified as described (56) with addition of RNase inhibitor to all buffers. Briefly, DG was dounce-  
608 homogenized in 1 ml lysis buffer and layered above a sucrose gradient for ultracentrifugation at  
609 28,600 RPM for 2 hours at 4°C. Nuclei were resuspended in Click-iT EdU AlexaFluor-488 with RNase  
610 inhibitor, and incubated 30 minutes at room temperature. Samples were passed through 40 µm filter,  
611 stained with 1 µg/ml DAPI, and kept on ice before sorting. Lysates processed identically from non-  
612 EdU-injected mice served as negative controls during sorting with Beckman Coulter MoFlo Cell Sorter.  
613 Cell cycle analysis by DNA content was performed with gates discriminating 2N and 4N cells by DAPI  
614 fluorescence.

615

#### 616 **RNA-seq: EdU<sup>+</sup> nuclei**

617 Purified EdU<sup>+</sup> nuclei from 3 *Kmt2d*<sup>+/*βgeo*</sup> and 3 wild-type littermate female mice (500 nuclei pooled per  
618 genotype) were sorted into Smart-Seq 2 lysis buffer (2 µL Smart-Seq2 lysis buffer with RNase  
619 inhibitor, 1 µL oligo-dT primer, and 1 µL dNTPs), briefly spun by tabletop microcentrifuge, and snap-  
620 frozen on dry ice. Nuclei were processed according to a modified Smart-seq2 protocol (57). Briefly,  
621 lysates were thawed to 4°C, heated to 72°C for 5 minutes, and immediately placed on ice. Template-  
622 switching first-strand cDNA synthesis was performed using a 5'-biotinylated TSO oligo. cDNAs were  
623 amplified using 20 cycles of KAPA HiFi PCR and 5'-biotinylated ISPCR primer. Amplified cDNA was

624 cleaned using 1:1 ratio of Ampure XP beads and approximately 250 pg was input to a one-quarter-  
625 sized Nextera XT tagmentation reaction. Tagmented fragments were amplified for 12 enrichment  
626 cycles and dual indexes were added to each well to uniquely label each library. Concentrations were  
627 assessed with Quant-iT PicoGreen dsDNA Reagent (Invitrogen) and samples were diluted to ~2nM  
628 and pooled. Pooled libraries were sequenced on the Illumina HiSeq 2500 platform to a target mean  
629 depth of ~8 x 105 bp paired-end fragments per cycle. Paired-end reads were aligned to mm10 using  
630 HISAT2 (58) with default parameters except: -p 8. Aligned reads from individual samples were  
631 quantified against a reference genome (GENCODE vM8) using cuffquant (59). Normalized expression  
632 estimates across all samples were obtained using cuffnorm with default parameters (60).

633

### 634 **RT-qPCR**

635 Total RNA was isolated by RNeasy Mini and cDNA libraries were constructed with High-Capacity  
636 cDNA Reverse Transcription Kit (Applied Biosystems) according to manufacturer protocols.  
637 Experiments were performed in technical triplicate, with biological replicates as indicated. Probes  
638 were from Taqman.

639

### 640 **Immunostaining, confocal imaging, and processing**

641 Coronal brain sections of 30  $\mu\text{m}$  (every sixth slice) were analyzed in serial order. Briefly, adult brains  
642 were PFA-fixed by transcardial perfusion and post-fixed for 12 hours before cryoprotection by 30%  
643 sucrose in phosphate buffer. Brains were sectioned by cryostat (Leica), directly mounted to charged  
644 slides, and stored at  $-80^{\circ}\text{C}$ . Antigen retrieval (DakoCytomation) was performed at  $95^{\circ}\text{C}$  for 20 minutes.  
645 Overnight incubation at  $4^{\circ}\text{C}$  in primary antibodies (**Supplementary Table 10**) preceded AlexaFluor-  
646 conjugated secondary antibody (1:500). Tiled, z-stacked images were acquired using Zeiss LSM780  
647 FCS AxioObserver confocal microscope and Zen software (Zeiss) to encompass entire DG structure.  
648 Images were quantified using Imaris (BitPlane) by experimenters blinded to genotype. Cell counts  
649 were corrected by DG area multiplied by z-thickness, and expressed as cells/ $\text{mm}^3$ . For pulse-label  
650 experiments, mice were injected with 150 mg/kg EdU in saline every 48 hours and sampled as above.  
651 DCX<sup>+</sup> neuroblast distance from SGZ plane was measured in Fiji (NIH). Patient-derived cell imaging  
652 utilized EVOS FL Cell Imaging System with analysis in Fiji.

653

### 654 **FACS and analysis**

655 Flow cytometry analysis with FACSverse and FACSuite (BD Biosciences), and sorting by Beckman  
656 Coulter MoFlo Cell Sorter with proper gate settings and doublet discrimination (**Supplementary**

657 **Figure 3J, Supplementary Figure 6A).** Runs of 10,000 or more cells were analyzed from technical  
658 triplicate culture wells and analyzed in FlowJo v10 (Tree Star Inc). Unstained and secondary-only  
659 samples served as control. Cells were sampled after 30-minute pulse of EdU (10  $\mu$ M) using Click-iT  
660 EdU Flow Cytometry Assay (ThermoFisher Scientific). CellTrace Violet and CellEvent caspase-3/7  
661 reagent (ThermoFisher Scientific) were used according to manufacturer protocols. For cycle  
662 synchronization, 250 ng/ml nocodazole (Sigma) was applied for 18 hours before release.

663

### 664 **Magnetic Resonance Imaging (MRI)**

665 3D T2-weighted MRI (9.4T) was performed in PFA-perfused brains of *Kmt2d*<sup>+/ $\beta$ geo</sup> (n=3) and *Kmt2d*<sup>+/+</sup>  
666 (n=3) female mice aged 4 months. Atlas-based, volume-corrected analysis was performed in 25 brain  
667 regions (DtiStudio).

668

### 669 **Statistics**

670 For high-throughput experiments, see Methods. For cellular assays, see Figure Legends. Statistical  
671 analyses with multiple comparisons correction were done with GraphPad Prism (version 7.0b). Gene  
672 set enrichments were determined according to WebGestalt (61), or by Fisher's Exact Test in R version  
673 3.5.2 as indicated.

674

### 675 **Study Approval**

676 All mouse experiments were performed using protocols approved by the Animal Care and Use  
677 Committee of Johns Hopkins University School of Medicine and are in accordance with NIH  
678 guidelines. Informed consent regarding KS1 patient samples was obtained according to institutional  
679 IRB and ISCRO protocols approved by JHU.

680

### 681 **Author contributions**

682 GAC and HTB conceived the study; GAC and HTB wrote the manuscript; GAC, HNN, GC, JDR, LZ  
683 performed experiments; GAC, LB, JA, KDH and LG analyzed data.

684

### 685 **Acknowledgments**

686 HTB is funded through an Early Independence Award from the National Institutes of Health (NIH,  
687 DP5OD017877), the Icelandic Research Fund (195835-051), and the Louma G. Foundation. Imaging  
688 was performed with NIH support (S10OD016374). Karyotype facility supported by NICHD (1U54  
689 HD079123-01A1). FACS was performed at the Bloomberg School of Public Health. We thank Michael

690 Sherman for assistance with image quantification and Manisha Aggarwal for MRI. Schematics created  
691 with Mark Sandusky or Biorender.com. Hongjun Song and Kai Ge provided critical reagents and  
692 advice. Hal Dietz and Gregg Semenza provided conceptual guidance.

693

694 **Data availability**

695 High-throughput data are publicly available. RNA-seq and ChIP-seq: GEO #GSE126167. scRNA-seq:  
696 GEO #GSE126027. Scripts for scRNA-seq analysis are available at  
697 <https://github.com/Jaugust7/Kabuki-Syndrome-scRNA-analysis>.

698 **References**

- 699 1. Schuettengruber B, Bourbon H-M, Di Croce L, Cavalli G. Genome regulation by polycomb and  
700 trithorax: 70 years and counting.. *Cell* 2017;171(1):34–57.
- 701 2. Bjornsson HT. The Mendelian disorders of the epigenetic machinery.. *Genome Res.*  
702 2015;25(10):1473–1481.
- 703 3. Ng SB et al. Exome sequencing identifies MLL2 mutations as a cause of Kabuki syndrome.. *Nat.*  
704 *Genet.* 2010;42(9):790–793.
- 705 4. Miyake N et al. KDM 6 A Point Mutations Cause K abuki Syndrome.. *Human mutation*  
706 2013;34(1):108–110.
- 707 5. Hannibal MC et al. Spectrum of MLL2 (ALR) mutations in 110 cases of Kabuki syndrome.. *Am. J.*  
708 *Med. Genet. A* 2011;155A(7):1511–1516.
- 709 6. Ang S-Y et al. KMT2D regulates specific programs in heart development via histone H3 lysine 4 di-  
710 methylation.. *Development* 2016;143(5):810–821.
- 711 7. Ortega-Molina A et al. The histone lysine methyltransferase KMT2D sustains a gene expression  
712 program that represses B cell lymphoma development.. *Nat. Med.* 2015;21(10):1199–1208.
- 713 8. Zhang J et al. Disruption of KMT2D perturbs germinal center B cell development and promotes  
714 lymphomagenesis.. *Nat. Med.* 2015;21(10):1190–1198.
- 715 9. Lee J-E et al. H3K4 mono- and di-methyltransferase MLL4 is required for enhancer activation during  
716 cell differentiation.. *Elife* 2013;2:e01503.
- 717 10. Lin-Shiao E et al. KMT2D regulates p63 target enhancers to coordinate epithelial homeostasis..  
718 *Genes Dev.* 2018;32(2):181–193.
- 719 11. Froimchuk E, Jang Y, Ge K. Histone H3 lysine 4 methyltransferase KMT2D.. *Gene* 2017;627:337–  
720 342.
- 721 12. Bjornsson HT et al. Histone deacetylase inhibition rescues structural and functional brain deficits in  
722 a mouse model of Kabuki syndrome.. *Sci Transl Med* 2014;6(256):256ra135.
- 723 13. Boisgontier J et al. Anatomical and functional abnormalities on MRI in kabuki syndrome..  
724 *Neuroimage Clin.* [published online ahead of print: November 19, 2018]; doi:10.1016/j.nicl.2018.11.020
- 725 14. Gonçalves JT, Schafer ST, Gage FH. Adult neurogenesis in the hippocampus: from stem cells to  
726 behavior.. *Cell* 2016;167(4):897–914.
- 727 15. Moreno-Jiménez EP et al. Adult hippocampal neurogenesis is abundant in neurologically healthy  
728 subjects and drops sharply in patients with Alzheimer’s disease.. *Nat. Med.* 2019;25(4):554–560.
- 729 16. Tobin MK et al. Human hippocampal neurogenesis persists in aged adults and alzheimer’s disease  
730 patients.. *Cell Stem Cell* 2019;24(6):974–982.e3.
- 731 17. Sorrells SF et al. Human hippocampal neurogenesis drops sharply in children to undetectable levels  
732 in adults.. *Nature* 2018;555(7696):377–381.
- 733 18. Berg DA et al. A common embryonic origin of stem cells drives developmental and adult  
734 neurogenesis.. *Cell* 2019;177(3):654–668.e15.
- 735 19. Zheng X et al. Metabolic reprogramming during neuronal differentiation from aerobic glycolysis to  
736 neuronal oxidative phosphorylation.. *Elife* 2016;5. doi:10.7554/eLife.13374
- 737 20. Mazumdar J et al. O2 regulates stem cells through Wnt/β-catenin signalling.. *Nat. Cell Biol.*  
738 2010;12(10):1007–1013.
- 739 21. Chatzi C, Schnell E, Westbrook GL. Localized hypoxia within the subgranular zone determines the  
740 early survival of newborn hippocampal granule cells.. *Elife* 2015;4:e08722.
- 741 22. Morimoto BH, Koshland DE. Induction and expression of long- and short-term neurosecretory  
742 potentiation in a neural cell line.. *Neuron* 1990;5(6):875–880.
- 743 23. Wang C et al. Enhancer priming by H3K4 methyltransferase MLL4 controls cell fate transition..



- 744 *Proc. Natl. Acad. Sci. USA* 2016;113(42):11871–11876.
- 745 24. Guo C et al. Global identification of MLL2-targeted loci reveals MLL2’s role in diverse signaling  
746 pathways.. *Proc. Natl. Acad. Sci. USA* 2012;109(43):17603–17608.
- 747 25. Semenza GL. HIF-1: mediator of physiological and pathophysiological responses to hypoxia.. *J.*  
748 *Appl. Physiol.* 2000;88(4):1474–1480.
- 749 26. Guimarães-Camboa N et al. Hif1 $\alpha$  represses cell stress pathways to allow proliferation of hypoxic  
750 fetal cardiomyocytes.. *Dev. Cell* 2015;33(5):507–521.
- 751 27. Benita Y et al. An integrative genomics approach identifies Hypoxia Inducible Factor-1 (HIF-1)-  
752 target genes that form the core response to hypoxia.. *Nucleic Acids Res.* 2009;37(14):4587–4602.
- 753 28. Sanz JH, Lipkin P, Rosenbaum K, Mahone EM. Developmental profile and trajectory of  
754 neuropsychological skills in a child with Kabuki syndrome: implications for assessment of syndromes  
755 associated with intellectual disability.. *Clin Neuropsychol* 2010;24(7):1181–1192.
- 756 29. Wen Z et al. Synaptic dysregulation in a human iPSC cell model of mental disorders.. *Nature*  
757 2014;515(7527):414–418.
- 758 30. Li W et al. Rapid induction and long-term self-renewal of primitive neural precursors from human  
759 embryonic stem cells by small molecule inhibitors.. *Proc. Natl. Acad. Sci. USA* 2011;108(20):8299–  
760 8304.
- 761 31. McInnes L, Healy J, Saul N, Großberger L. UMAP: uniform manifold approximation and projection.  
762 *JOSS* 2018;3(29):861.
- 763 32. Benjamin JS et al. A ketogenic diet rescues hippocampal memory defects in a mouse model of  
764 Kabuki syndrome.. *Proc. Natl. Acad. Sci. USA* 2017;114(1):125–130.
- 765 33. Morris AM, Churchwell JC, Kesner RP, Gilbert PE. Selective lesions of the dentate gyrus produce  
766 disruptions in place learning for adjacent spatial locations.. *Neurobiol. Learn. Mem.* 2012;97(3):326–  
767 331.
- 768 34. Zhuo J-M et al. Young adult born neurons enhance hippocampal dependent performance via  
769 influences on bilateral networks.. *Elife* 2016;5. doi:10.7554/eLife.22429
- 770 35. Snyder JS. Recalibrating the relevance of adult neurogenesis.. *Trends Neurosci.* 2019;42(3):164–  
771 178.
- 772 36. Chakraborty AA et al. Histone demethylase KDM6A directly senses oxygen to control chromatin  
773 and cell fate.. *Science (80-. ).* 2019;363(6432):1217–1222.
- 774 37. Batie M et al. Hypoxia induces rapid changes to histone methylation and reprograms chromatin..  
775 *Science (80-. ).* 2019;363(6432):1222–1226.
- 776 38. Luo W, Wang Y. Epigenetic regulators: multifunctional proteins modulating hypoxia-inducible  
777 factor- $\alpha$  protein stability and activity.. *Cell Mol. Life Sci.* 2018;75(6):1043–1056.
- 778 39. Bernas S, Leiter O, Walker T, Kempermann G. Isolation, culture and differentiation of adult  
779 hippocampal precursor cells. *Bio Protoc* 2017;7(21). doi:10.21769/BioProtoc.2603
- 780 40. Patro R, Duggal G, Love MI, Irizarry RA, Kingsford C. Salmon provides fast and bias-aware  
781 quantification of transcript expression.. *Nat. Methods* 2017;14(4):417–419.
- 782 41. Sonesson C, Love MI, Robinson MD. Differential analyses for RNA-seq: transcript-level estimates  
783 improve gene-level inferences. [version 2; peer review: 2 approved]. *F1000Res.* 2015;4:1521.
- 784 42. Robinson MD, McCarthy DJ, Smyth GK. edgeR: a Bioconductor package for differential expression  
785 analysis of digital gene expression data.. *Bioinformatics* 2010;26(1):139–140.
- 786 43. McCarthy DJ, Chen Y, Smyth GK. Differential expression analysis of multifactor RNA-Seq  
787 experiments with respect to biological variation.. *Nucleic Acids Res.* 2012;40(10):4288–4297.
- 788 44. Ritchie ME et al. limma powers differential expression analyses for RNA-sequencing and  
789 microarray studies.. *Nucleic Acids Res.* 2015;43(7):e47.

- 790 45. Giner G, Smyth GK. Statmod: probability calculations for the inverse Gaussian distribution.. *arXiv*  
791 *preprint arXiv:1603.06687* 2016;
- 792 46. Love MI, Huber W, Anders S. Moderated estimation of fold change and dispersion for RNA-seq  
793 data with DESeq2.. *Genome Biol.* 2014;15(12):550.
- 794 47. Trapnell C et al. The dynamics and regulators of cell fate decisions are revealed by pseudotemporal  
795 ordering of single cells.. *Nat. Biotechnol.* 2014;32(4):381–386.
- 796 48. Lun ATL, McCarthy DJ, Marioni JC. A step-by-step workflow for low-level analysis of single-cell  
797 RNA-seq data with Bioconductor. [version 2; peer review: 3 approved, 2 approved with reservations].  
798 *F1000Res.* 2016;5:2122.
- 799 49. Langmead B, Salzberg SL. Fast gapped-read alignment with Bowtie 2.. *Nat. Methods*  
800 2012;9(4):357–359.
- 801 50. Zhang Y et al. Model-based analysis of ChIP-Seq (MACS).. *Genome Biol.* 2008;9(9):R137.
- 802 51. Amemiya HM, Kundaje A, Boyle AP. The ENCODE blacklist: identification of problematic regions  
803 of the genome.. *Sci. Rep.* 2019;9(1):9354.
- 804 52. Liao Y, Smyth GK, Shi W. The R package Rsubread is easier, faster, cheaper and better for  
805 alignment and quantification of RNA sequencing reads.. *Nucleic Acids Res.* 2019;47(8):e47.
- 806 53. Landt SG et al. ChIP-seq guidelines and practices of the ENCODE and modENCODE consortia..  
807 *Genome Res.* 2012;22(9):1813–1831.
- 808 54. Rainer. EnsDb.Mmusculus.v79: Ensembl based annotation package.. *R package version 2.99.0.*  
809 2017;
- 810 55. Lawrence M et al. Software for computing and annotating genomic ranges.. *PLoS Comput. Biol.*  
811 2013;9(8):e1003118.
- 812 56. Rizzardi LF et al. Neuronal brain-region-specific DNA methylation and chromatin accessibility are  
813 associated with neuropsychiatric trait heritability.. *Nat. Neurosci.* 2019;22(2):307–316.
- 814 57. Picelli S et al. Smart-seq2 for sensitive full-length transcriptome profiling in single cells.. *Nat.*  
815 *Methods* 2013;10(11):1096–1098.
- 816 58. Kim D, Langmead B, Salzberg SL. HISAT: a fast spliced aligner with low memory requirements..  
817 *Nat. Methods* 2015;12(4):357–360.
- 818 59. Mudge JM, Harrow J. Creating reference gene annotation for the mouse C57BL6/J genome  
819 assembly.. *Mamm. Genome* 2015;26(9–10):366–378.
- 820 60. Trapnell C et al. Differential gene and transcript expression analysis of RNA-seq experiments with  
821 TopHat and Cufflinks.. *Nat. Protoc.* 2012;7(3):562–578.
- 822 61. Wang J, Vasaiakar S, Shi Z, Greer M, Zhang B. WebGestalt 2017: a more comprehensive, powerful,  
823 flexible and interactive gene set enrichment analysis toolkit.. *Nucleic Acids Res.* 2017;45(W1):W130–  
824 W137.
- 825  
826  
827

828 **Figures**

829 Figure 1. Genetic ablation of the *Kmt2d* SET methyltransferase domain disrupts proliferation and cell  
830 cycle in a cell-autonomous manner.

831 Figure 2. Suppressed transcription of KMT2D-regulated hypoxia response genes upon loss of the  
832 *Kmt2d* SET methyltransferase domain in neuronal cells.

833 Figure 3. KS1 patient-derived cells recapitulate KMT2D-associated defects in proliferation and cell  
834 cycle.

835 Figure 4. Transcriptional suppression of metabolic genes in cycling cells, and precocious neuronal  
836 differentiation in KS1 patient-derived NSPCs.

837 Figure 5. In vivo defects of neurogenesis and NSPC differentiation in a *Kmt2d*<sup>+/ $\beta$ geo</sup> mouse model of  
838 KS1

839

840 **Supplementary Figures**

841 Supplementary Figure 1: CRISPR-targeted HT22 cells

842 Supplementary Figure 2: HT22 cell RNA-seq and ChIP-seq analysis

843 Supplementary Figure 3: iPSC and NSPC validations and phenotyping

844 Supplementary Figure 4: iPSC and NSPC single-cell RNA-seq analysis

845 Supplementary Figure 5: Stratified scRNA-seq analysis of NSPCs

846 Supplementary Figure 6: Adult neurogenesis phenotypes in *Kmt2d*<sup>+/ $\beta$ geo</sup> mice

847 Supplementary Figure 7: Pulse-labeling to birth-date adult-born NSPCs in vivo

848 Supplementary Figure 8: Comparison of gene expression across KS1 models

849 Supplementary Figure 9: HIF1A activation in primary hippocampal NSPCs

850 Supplementary Figure 10: Precocious in vitro differentiation of primary hippocampal NSPCs

851

852 **Supplementary Tables**

853 Supplementary Table 1: Differentially expressed genes in HT22 cells (*Kmt2d*<sup>+/+</sup> versus *Kmt2d* <sup>$\Delta/\Delta$</sup> )

854 Supplementary Table 2: KMT2D ChIP-seq peaks in HT22 cells (*Kmt2d*<sup>+/+</sup> cells)

855 Supplementary Table 3: KMT2D-bound genes in HT22 cells (*Kmt2d*<sup>+/+</sup> cells)

856 Supplementary Table 4: Differentially expressed genes in iPSCs (KS1 versus controls)

857 Supplementary Table 5: Differentially expressed genes in NSPCs (KS1 versus controls)

858 Supplementary Table 6: Intersected gene sets of iPSCs and NSPCs

859 Supplementary Table 7: Differentially expressed genes in NSPCs (stratified by subsets)

860 Supplementary Table 8: Differentially expressed genes in EdU<sup>+</sup> DG nuclei of *Kmt2d*<sup>+/ $\beta$ geo</sup> mice

861 Supplementary Table 9: MRI volumetric comparisons in wild-type and *Kmt2d*<sup>+/ $\beta$ geo</sup> mice

862 Supplementary Table 10: Reagents

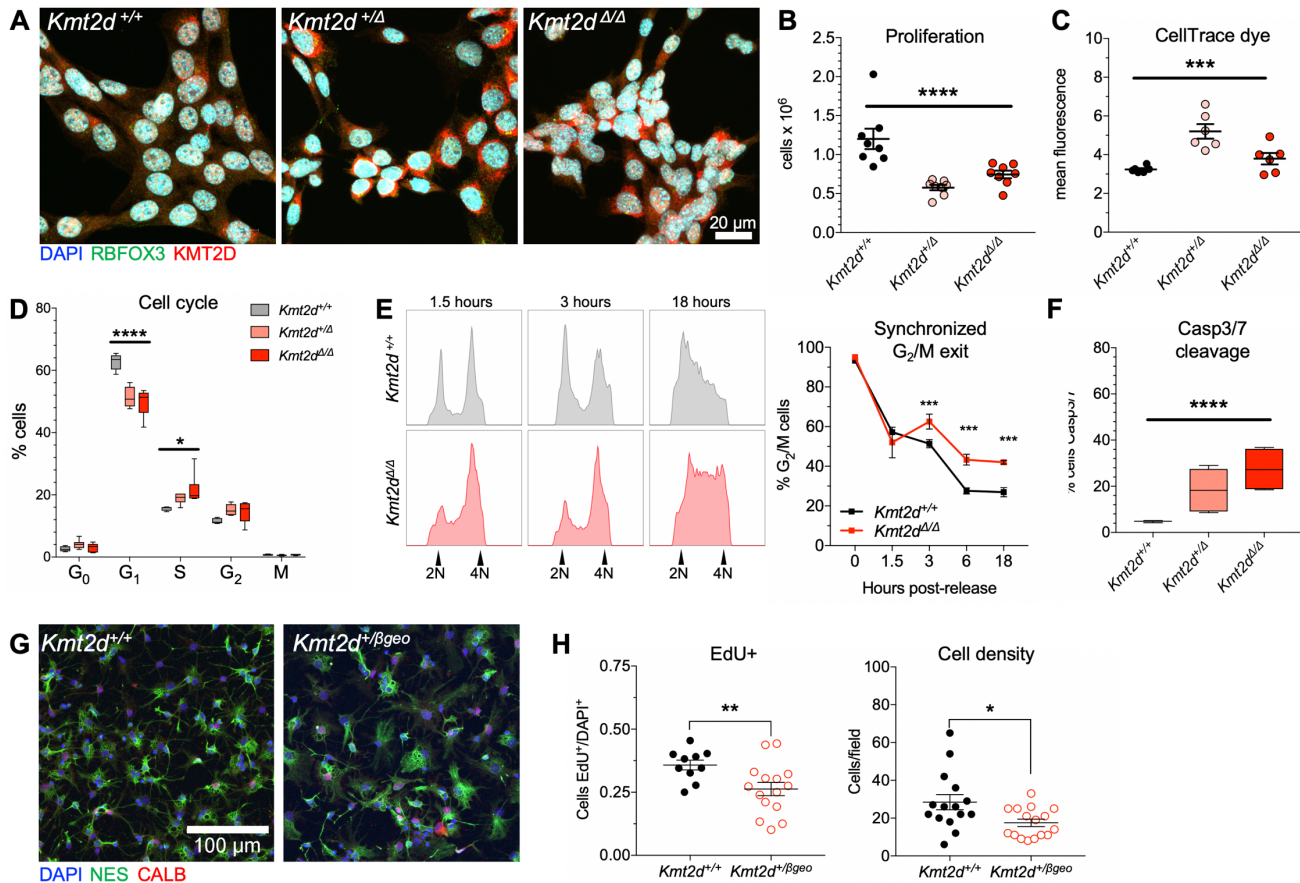

863

864

865

866

867

868

869

870

871

872

873

874

875

876

877

878

879

880

**Figure 1. Genetic ablation of the *Kmt2d* SET methyltransferase domain disrupts proliferation and cell cycle in a cell-autonomous manner.** (A) Representative immunostaining against KMT2D and RBFOX3 in *Kmt2d*<sup>+/+</sup>, *Kmt2d*<sup>+/-</sup>, and *Kmt2d*<sup>-/-</sup> HT22 cells. (B) Decreased proliferation in *Kmt2d*-inactivated cells quantified 72 hours after equal density plating. One-way ANOVA. (C) Generational tracking reveals fewer cell divisions, i.e. reduced dye dilution, of CellTrace Violet in *Kmt2d*<sup>+/-</sup> and *Kmt2d*<sup>-/-</sup> cells at 72 hours. One-way ANOVA. (D) Flow cytometric quantification of cell cycle phases using KI67 and DAPI fluorescence. One-way ANOVA for each cycle phase, independently. (E) *Kmt2d*<sup>+/+</sup> and *Kmt2d*<sup>-/-</sup> cells synchronized and released for analysis of G<sub>2</sub>/M exit, by DNA content, up to 18 hours after release, and quantification of cells in G<sub>2</sub>/M (technical triplicates per time point). Bars indicate mean ± SEM. Two-way ANOVA (P<0.0001) with post hoc multiple comparisons. (F) Flow cytometric quantification of early apoptotic cells by caspase-3/7 fluorescence. One-way ANOVA. (G) Confocal images of nestin (NES) and calbindin (CALB) expressing primary hippocampal NSPCs from *Kmt2d*<sup>+/+</sup> and *Kmt2d*<sup>+/-βgeo</sup> mice, and (H) quantified proliferation. Student's t-test. Bars indicate mean ± SEM. Boxes indicate mean ± interquartile range; whiskers indicate minima and maxima. (\*p<0.05, \*\*p<0.01, \*\*\*p<0.001, \*\*\*\*p<0.0001). Scale bars 20 μm (A) or 100 μm (G).

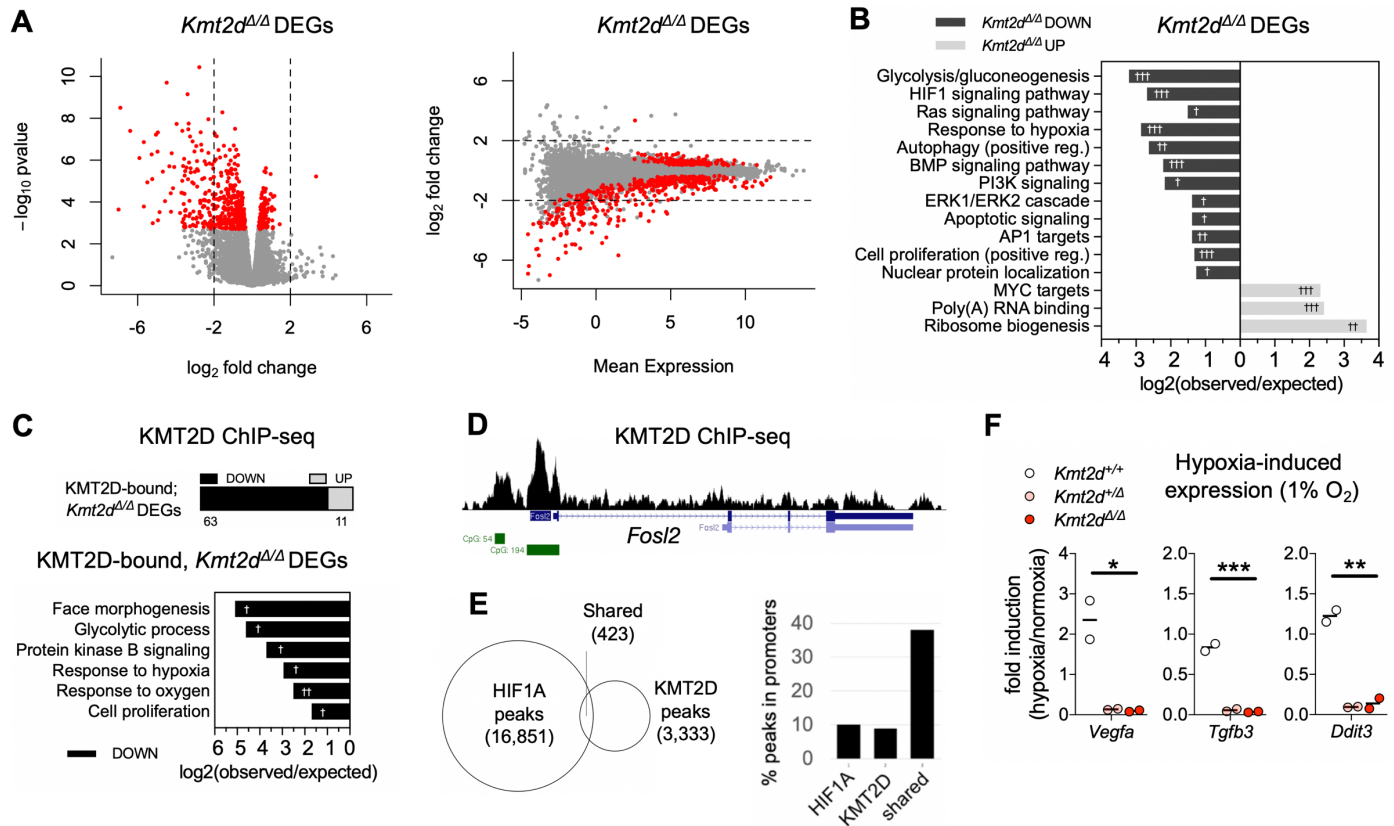

881

882 **Figure 2. Suppressed transcription of KMT2D-regulated hypoxia response genes upon loss of**  
 883 **the *Kmt2d* SET methyltransferase domain in neuronal cells. (A)** Expression analysis by RNA-seq in  
 884 HT22 cells reveals 575 significant differentially expressed genes (DEGs) in *Kmt2d*<sup>Δ/Δ</sup> clones (3 biological  
 885 replicates) relative to *Kmt2d*<sup>+/+</sup> cells, each in technical triplicate. Fold changes in expression indicate  
 886 most significant *Kmt2d*<sup>Δ/Δ</sup> DEGs (~76%, red dots) are downregulated in *Kmt2d*<sup>Δ/Δ</sup> cells, plotted against  
 887 p-value and mean expression. **(B)** Gene networks significantly enriched among down- or up-regulated  
 888 *Kmt2d*<sup>Δ/Δ</sup> DEGs. **(C)** *Kmt2d*<sup>Δ/Δ</sup> DEGs which are also KMT2D-bound, as determined by ChIP-seq  
 889 chromatin profiling in *Kmt2d*<sup>+/+</sup> HT22 cells, and gene networks significantly enriched among KMT2D-  
 890 bound, *Kmt2d*<sup>Δ/Δ</sup> DEGs. **(D)** Representative ChIP-seq track of a KMT2D-bound, *Kmt2d*<sup>Δ/Δ</sup> DEG  
 891 depicting KMT2D binding peaks (black), RefSeq gene annotations (blue), and CpG islands (green). **(E)**  
 892 Overlapping loci of observed KMT2D-ChIP peaks in HT22 cells and HIF1A-ChIP peaks in embryonic  
 893 heart (26). Overlapping KMT2D/HIF1A peak regions, compared to individually bound regions, are  
 894 enriched at gene promoters. **(F)** RT-qPCR analysis of hypoxia-induced gene expression in *Kmt2d*<sup>+/+</sup>,  
 895 *Kmt2d*<sup>+/Δ</sup>, and *Kmt2d*<sup>Δ/Δ</sup> cells, following 72 hours in normoxia (21% O<sub>2</sub>) or hypoxia (1% O<sub>2</sub>), with fold  
 896 induction of target gene mRNA. 2 biological replicates per genotype, each in technical triplicate. One-  
 897 way ANOVA. (\*p<0.05, \*\*p<0.01, \*\*\*p<0.001). Fisher's Exact Test (†FDR<0.05, ††FDR<0.01,  
 898 †††FDR<0.001).

899

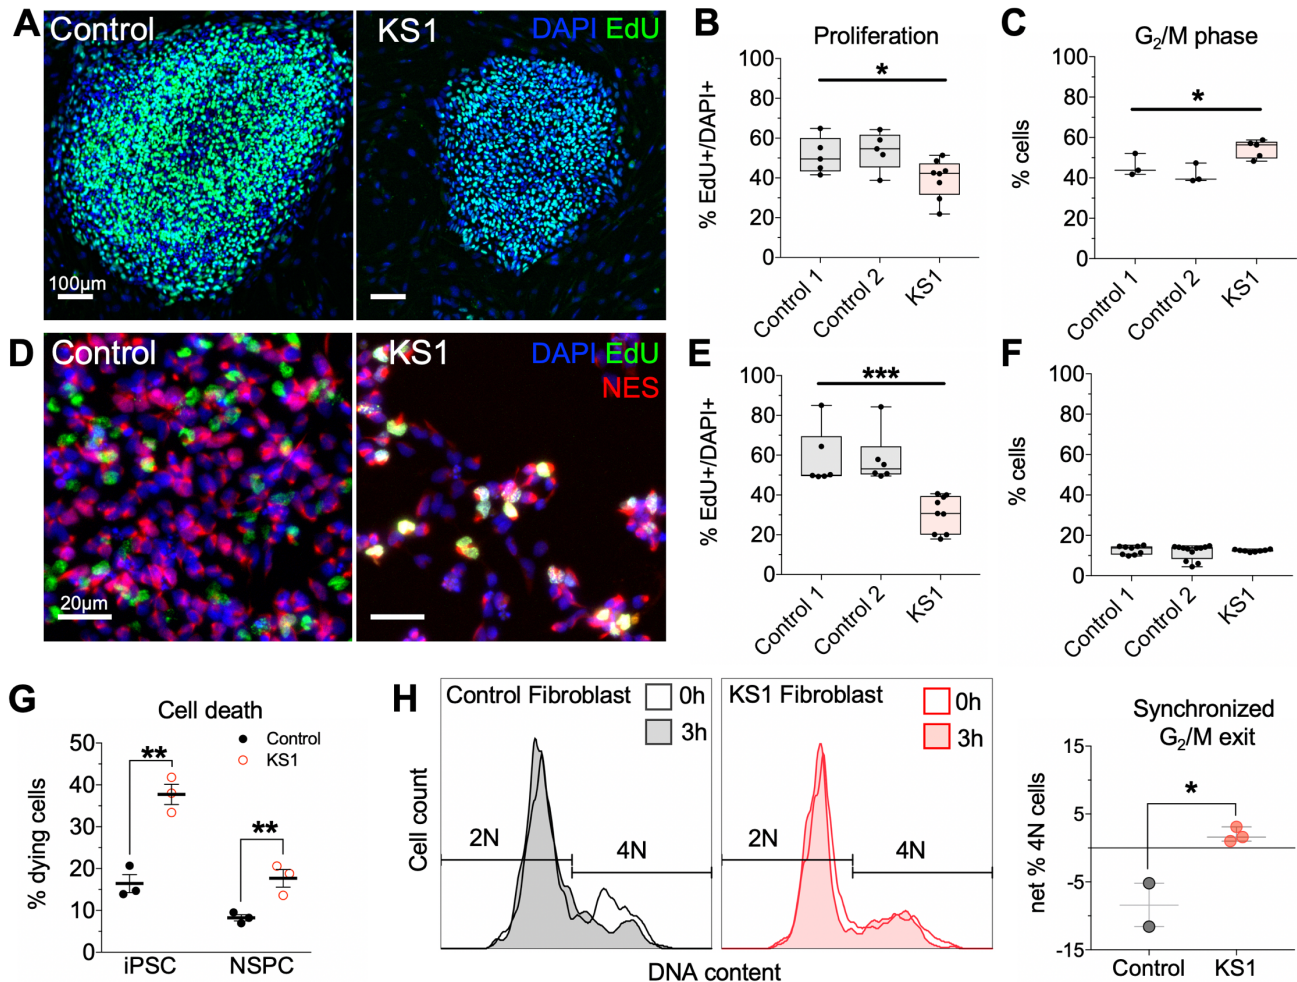

900  
901

902 **Figure 3. KS1 patient-derived cells recapitulate KMT2D-associated defects in proliferation and**  
 903 **cell cycle.** (A) Representative immunostaining of iPSCs derived from a *KMT2D*<sup>-/-</sup> KS1 patient  
 904 (c.7903C>T:p.R2635\*) and healthy controls. (B) Proliferating cells were pulsed with EdU for 30 minutes  
 905 and quantified by flow cytometry. One-way ANOVA. (C) Cell cycle analysis in iPSCs, discriminating 2N  
 906 and 4N DNA content (G<sub>1</sub>/G<sub>0</sub> and G<sub>2</sub>/M, respectively) by flow cytometry using DAPI fluorescence. One-  
 907 way ANOVA. (D) Representative immunostaining of NES-expressing NSPCs induced from iPSCs of  
 908 KS1 patient and controls. (E) EdU pulse assay quantified by flow cytometry. One-way ANOVA. (F) Cell  
 909 cycle analysis in NSPCs. One-way ANOVA. (G) Quantification of dying cells by flow cytometric scatter  
 910 profiles in KS1 patient and control cells. Student's t-test. (H) Synchronized G<sub>2</sub>/M exit analysis by flow  
 911 cytometry in fibroblasts from KS1 patients (KS1-1, KS1-2, KS1-3) and healthy controls (Controls 3 and  
 912 4), in triplicate per cell line. Cells were enriched for G<sub>2</sub>/M phase using nocodazole and analyzed by  
 913 DAPI fluorescence to quantify G<sub>2</sub>/M phase cell fractions at 0 and 3 hours after release. Student's t-  
 914 test. Bars indicate mean ± SEM. Boxes indicate mean ± interquartile range; whiskers indicate minima  
 915 and maxima. (\*p<0.05, \*\*p<0.01, \*\*\*p<0.001). Scale bars 100 μm (A) or 20 μm (D).

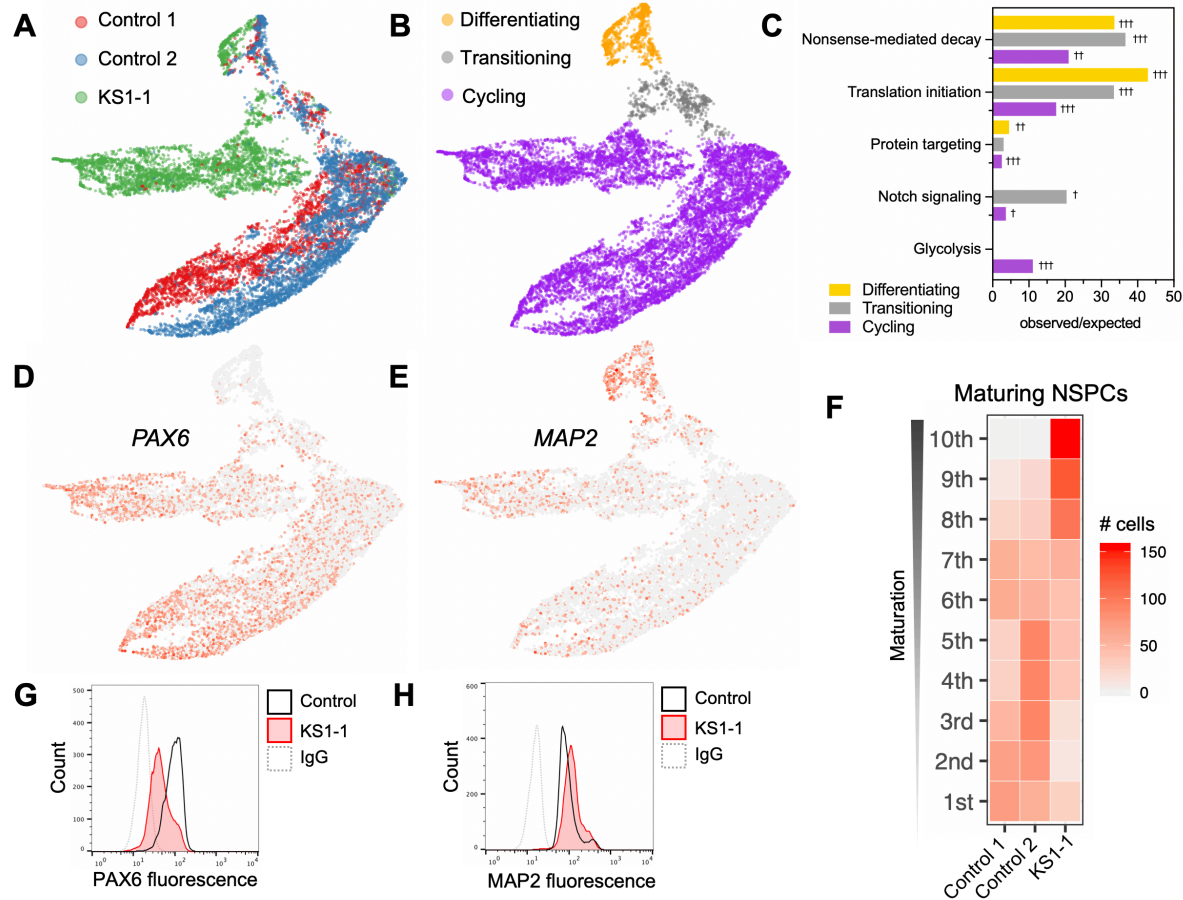

916

917

918

919

920

921

922

923

924

925

926

927

928

929

930

931

932

933

**Figure 4. Transcriptional suppression of metabolic genes in cycling cells, and precocious neuronal differentiation in KS1 patient-derived NSPCs.**

(A) Single-cell RNA-seq profiling in patient and healthy control iPSC-derived NSPCs (~5,000 cells per patient), with Uniform Manifold Approximation Projection (UMAP) to visualize gene expression differences between cells. (B) NSPCs partitioned by maturation stage as defined by stage-specific marker expression, and (C) enriched gene networks, analyzed exclusively among DEGs for each NSPC subset (cycling, transitioning, and differentiating). (D-E) Representative UMAPs annotated by relative expression intensities of NSPC markers, revealing the maturation trajectory from early NSPCs (*PAX6*<sup>+</sup>) to differentiating NSPCs (*MAP2*<sup>+</sup>). (F) Heatmap comparing density of NSPCs along the maturation trajectory, defined by binned marker expression from earliest (1<sup>st</sup>) to most differentiated (10<sup>th</sup>) deciles, with KS1 cells disproportionately occupying the most mature bins. (G-H) Protein-level experimental validation of marker expression differences by flow cytometry in NSPCs from KS1 patient and controls, plotting fluorescence intensities of *PAX6* and *MAP2*. Fisher's Exact Test (†FDR<0.05, ††FDR<0.01, †††FDR<0.001).

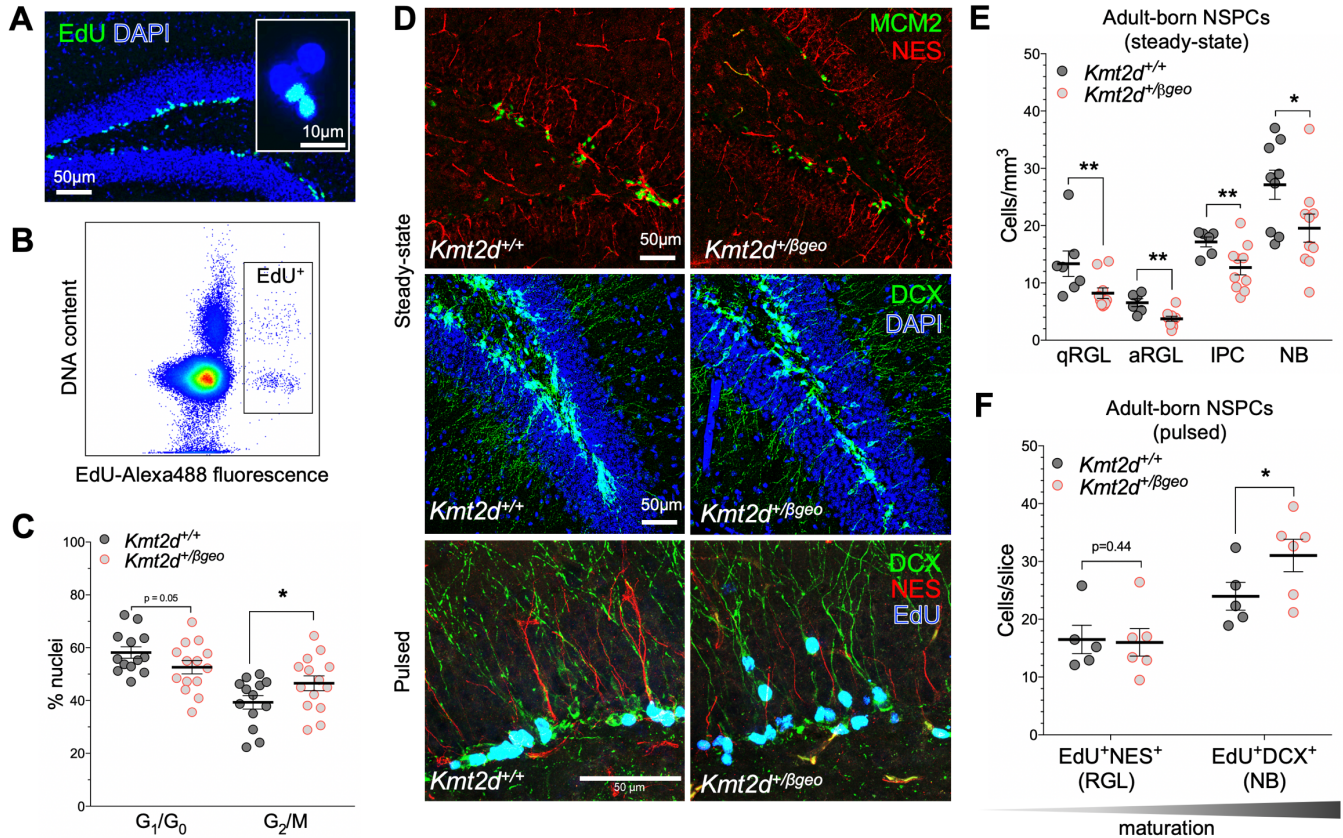

934  
935  
936  
937  
938  
939  
940  
941  
942  
943  
944  
945  
946  
947  
948  
949  
950  
951

**Figure 5. In vivo defects of neurogenesis and NSPC differentiation in a *Kmt2d*<sup>+/βgeo</sup> mouse model of KS1**

(A) Immunostaining images of dividing (EdU-pulsed) dentate gyrus (DG) NSPCs, and nuclei purified from micro-dissected DG by fluorescence-activated cell sorting (FACS) (B) of labeled nuclei. (C) Cell cycle analysis in purified EdU+ DG nuclei from *Kmt2d*<sup>+/+</sup> and *Kmt2d*<sup>+/βgeo</sup> mice sampled 16 hours post-pulse, using DAPI fluorescence (13-14 mice per genotype, 200-500 nuclei per mouse). (D) Representative confocal immunostaining of neurogenesis markers in the DG of adult *Kmt2d*<sup>+/+</sup> and *Kmt2d*<sup>+/βgeo</sup> mice at steady-state (6-10 mice per genotype, 7-10 z-stack images per mouse) or after EdU pulse (5-6 mice per genotype, 10 z-stack images per mouse). NES<sup>+</sup> radial glia-like (RGL) NSPCs, in either quiescent (MCM2<sup>-</sup>) or activated (MCM2<sup>+</sup>) states (qRGL and aRGL, respectively), MCM2<sup>+</sup>NES<sup>-</sup> intermediate progenitor cells (IPCs), and DCX<sup>+</sup> neuroblasts (NB) were quantified. (E-F) Quantification of stage-specific NSPC densities (qRGL, aRGL, IPC, and NB) in adult *Kmt2d*<sup>+/+</sup> and *Kmt2d*<sup>+/βgeo</sup> mice at steady-state (E) or after EdU pulse-chase (2 weeks) to birthdate differentiating NSPCs (F). Bars indicate mean ± SEM. Student's t-test (\**p*<0.05, \*\**p*<0.01, \*\*\**p*<0.001). Scale bars 50 μm, unless specified (A, inset, 10 μm).



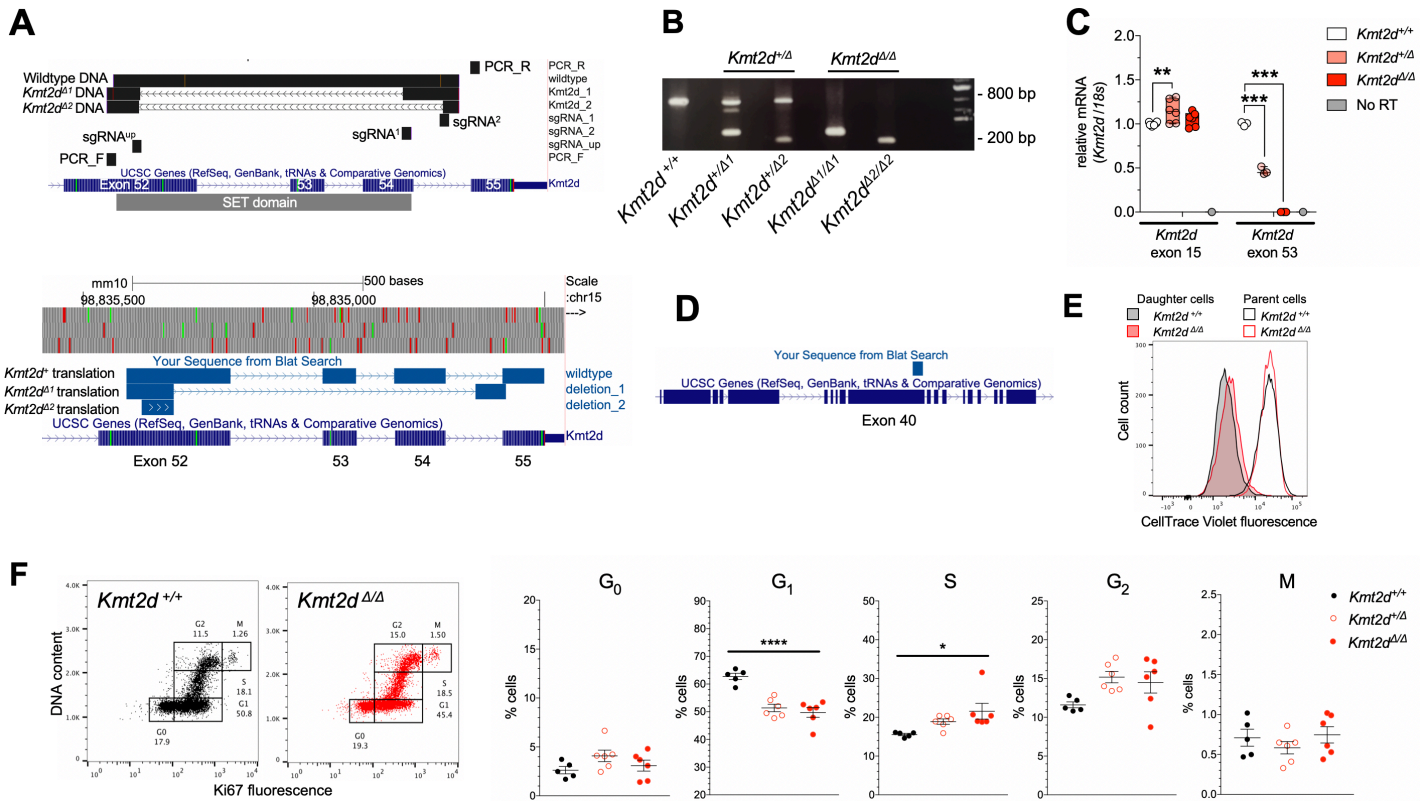

952  
953

954 **Supplementary Figure 1. CRISPR-targeted HT22 cells.** (A) Sanger-sequenced DNA of wild-type  
955 (*Kmt2d*<sup>+/+</sup>) and targeted (*Kmt2d*<sup>Δ/Δ</sup>) alleles in HT22 cells, mapped with sgRNAs and PCR primers, to  
956 *Kmt2d* locus (mm10) on chromosome 15. Mapping of Sanger-sequenced DNA after in silico  
957 translation to predict amino acid sequences illustrates premature termination codons (PTC) created in  
958 *Kmt2d*<sup>Δ1</sup> and *Kmt2d*<sup>Δ2</sup> alleles. (B) PCR with probes flanking sgRNA cut sites identifies experimental cell  
959 lines (*Kmt2d*<sup>+/Δ</sup> and *Kmt2d*<sup>Δ/Δ</sup>) compared to wild-type (*Kmt2d*<sup>+/+</sup>). (C) RT-qPCR analysis of mRNA using  
960 probes spanning upstream exons (15-16) or exons within the deletion site (53-54). Two-way ANOVA  
961 with post hoc multiple comparisons. (D) Mapped peptide sequence of KMT2D antibody (Sigma). (E)  
962 Flow cytometric CellTrace fluorescence after 72 hours in HT22 cells. Increased intensity indicates less  
963 dye dilution, i.e. fewer cell divisions in mutants (left). Parental cell data confirm genotype-independent  
964 dye uptake (right) at 0 hours. (F) Cell cycle gating by flow cytometric analysis using Ki67 and DAPI to  
965 discriminate individual stages (G<sub>0</sub>, G<sub>1</sub>, S, G<sub>2</sub>, M) in *Kmt2d*<sup>+/+</sup> and *Kmt2d*<sup>Δ/Δ</sup> cells, and quantification of  
966 each cycle phase. One-way ANOVA. Bars indicate mean ± SEM. Boxes indicate mean ± interquartile  
967 range; whiskers indicate minima and maxima. (\*p<0.05, \*\*p<0.01, \*\*\*p<0.001, \*\*\*\*p<0.0001).  
968

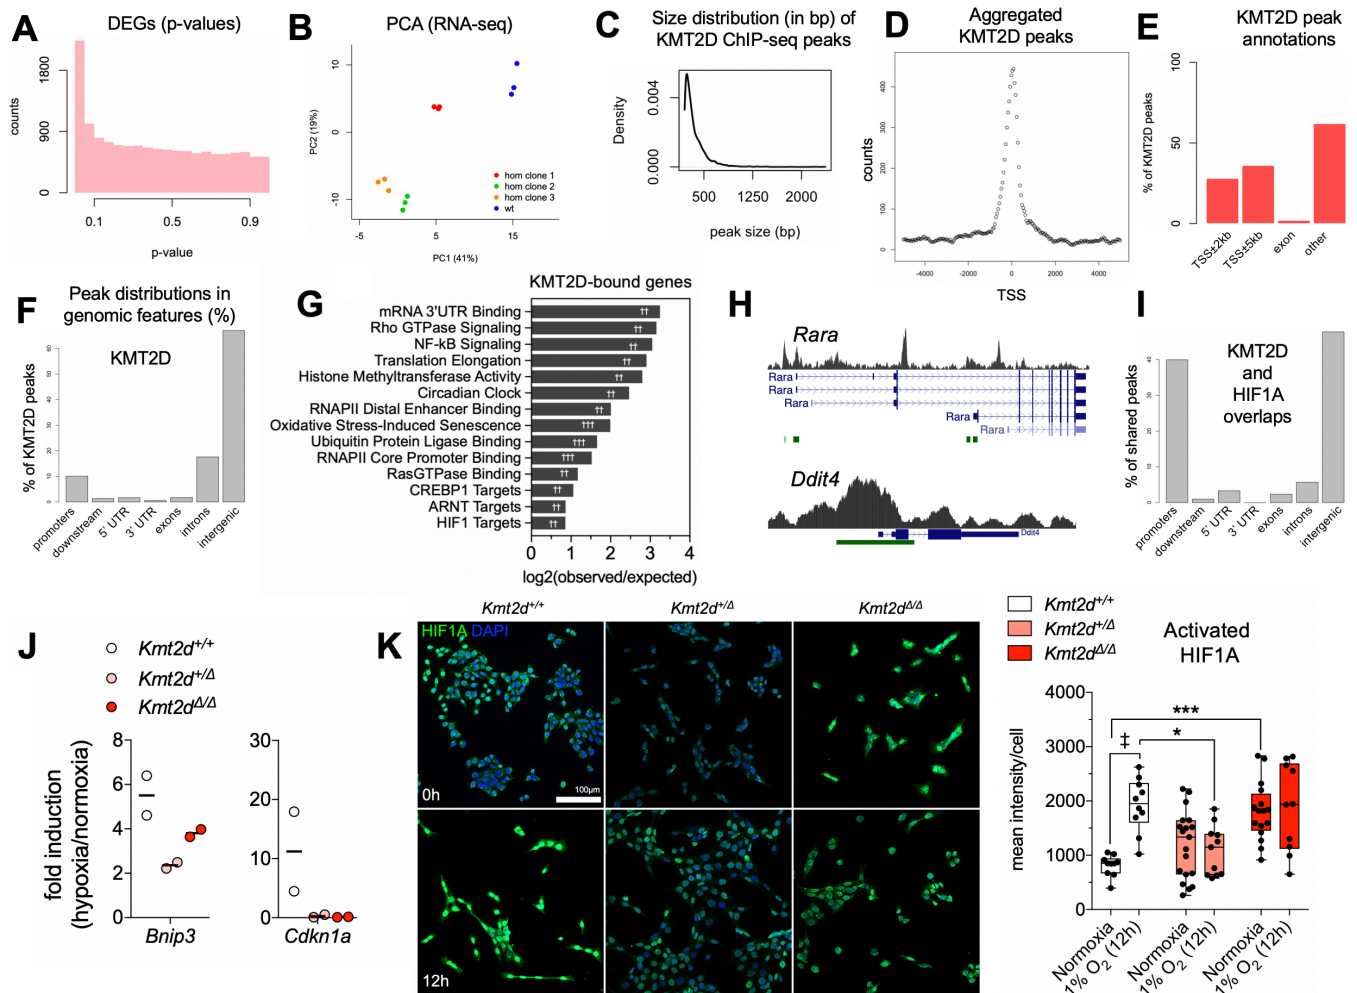

969  
970  
971  
972  
973  
974  
975  
976  
977  
978  
979  
980  
981  
982  
983  
984

**Supplementary Figure 2. HT22 cell RNA-seq and ChIP-seq analysis.** (A) P-value distribution in *Kmt2d*<sup>Δ/Δ</sup> DEGs relative to wild-type indicates a well-calibrated test. (B) PCA visualizing clear expression differences in wild-type and *Kmt2d*<sup>Δ/Δ</sup> HT22 cells. (C) The size distribution (in bp) of KMT2D ChIP-seq peaks. (D) Validation of KMT2D peak distributions about gene TSSs and (E-F) genomic features. (G) Gene networks showing highest fold change in enrichment among genes proximal to KMT2D peaks (TSS±5 kb). Fisher's Exact Test (†FDR<0.05, ††FDR<0.01, †††FDR<0.001). (H) KMT2D peaks clustered at alternate TSSs of *Rara* gene and enhancer-like peaks at *Ddit4* gene. (I) Genomic features at overlapping KMT2D and HIF1A (26) ChIP-seq peaks. (J) RT-qPCR analysis of hypoxia-induced gene expression in HT22 cells, upon 1% O<sub>2</sub> exposure. One-way ANOVA (n.s.). (K) HIF1A nuclear fluorescence, i.e. activation, analysis. Representative z-stacked confocal images are shown with quantifications of nuclear HIF1A fluorescence. Two-way ANOVA with post hoc multiple comparisons (significance from wild-type, \*p<0.05, \*\*p<0.01, \*\*\*p<0.001; and from baseline, ‡p<0.01). Boxes indicate mean ± interquartile range; whiskers indicate minima and maxima. Scale bar 100 μm.

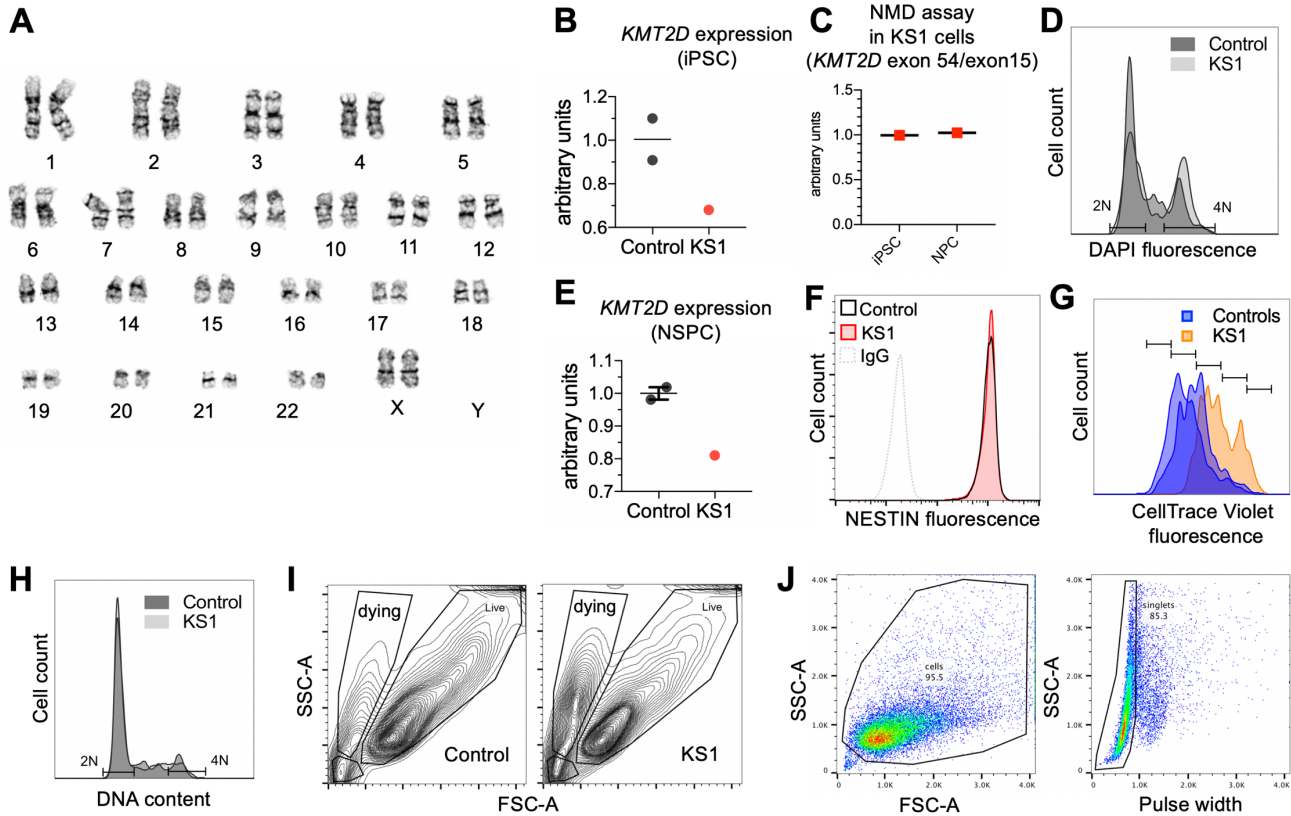

985  
986

987 **Supplementary Figure 3. iPSC and NSPC line validations and additional phenotyping.** (A) 46, XX  
 988 normal female karyotype in KS1-1 iPSCs. (B) RT-qPCR analysis of *KMT2D* (exon 15) expression in  
 989 KS1 iPSCs compared to two healthy control iPSC lines (C1-2 and C3-1). Dots represent average of  
 990 technical triplicates per patient line. Bars indicate mean. (C) RT-qPCR demonstrating equivalent  
 991 exonic ratios of *KMT2D* exon 15 to exon 54, measured in technical triplicate, consistent with NMD of  
 992 the entire transcript. (D) Flow cytometric analysis of DNA content by DAPI fluorescence in iPSCs. (E)  
 993 RT-qPCR analysis of *KMT2D* (exon 15) expression in NSPCs derived from the KS1 and control iPSC  
 994 lines, measured in technical triplicate. (F) Flow cytometric analysis of NES fluorescence intensity in  
 995 KS1 and control NSPCs. (G) CellTrace Violet generational tracking showing fewer divisions (i.e. higher  
 996 dye intensity) in patient-derived NSPCs over 72 hours. (H) Flow cytometric analysis of DNA content by  
 997 DAPI fluorescence in NSPCs. (I) Sample flow cytometric gating for detection of scatter profiles  
 998 indicative of cell death-associated cellular condensation. (J) Representative gating of viable cells and  
 999 doublet discrimination in immunofluorescence-based flow cytometric analyses of iPSCs and NSPCs.

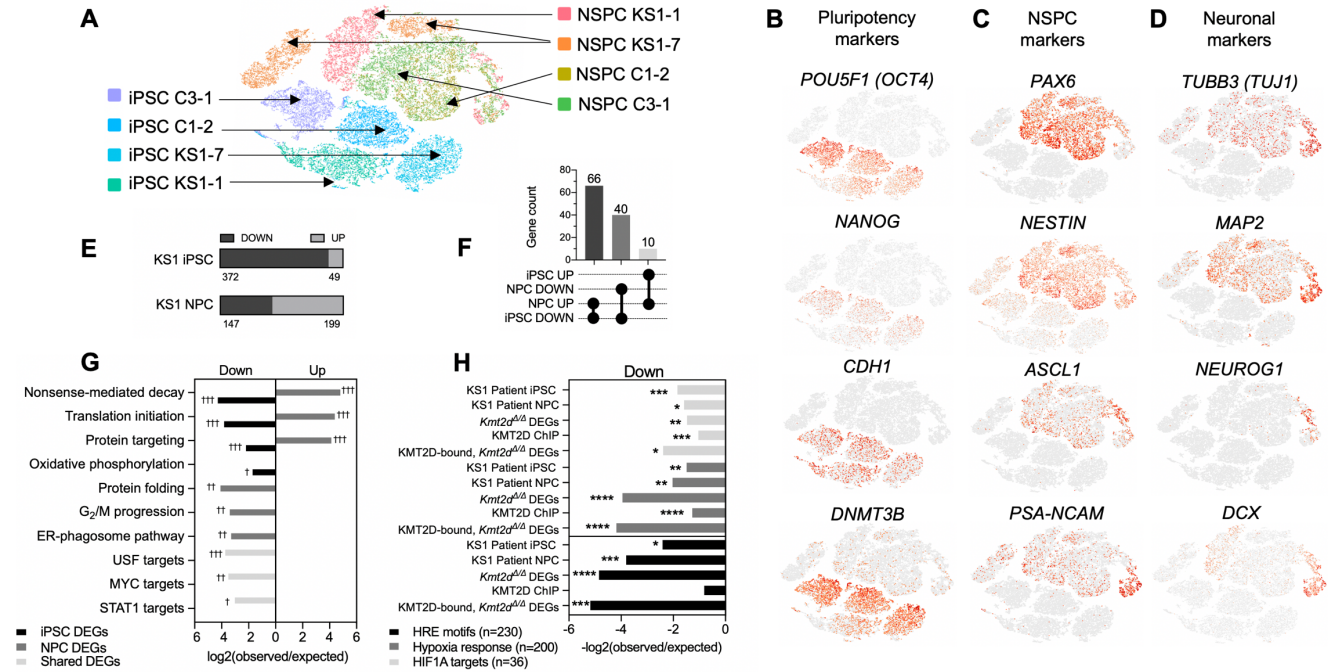

**Supplementary Figure 4. iPSC and NSPC single-cell RNA-seq analysis.** (A) t-stochastic neighbor embedding (tSNE) representation of iPSC and NSPC libraries sequenced on 10XGenomics platform. Cell clusters colored by cell type and patient ID. iPSCs and NSPCs derived from patient K1-7 were excluded from downstream analysis due to abnormal karyotype. (B-D) Representative tSNE of iPSC, NSPC, and neuronal markers demonstrating expected cell identities and revealing a gradient of cell maturation. (E) Proportions of DEGs down- or up-regulated in KS1 patient iPSCs or NSPCs compared to respective healthy controls, (F) DEG lists intersected for overlaps among down-regulated and up-regulated genes, and (G) Gene networks most enriched among differentially expressed genes (DEGs) in KS1 patient iPSCs and NSPCs relative to respective healthy controls, and DEGs shared in both cell types. (H) Significant enrichments of Hypoxia Response genes, HIF1A Direct Target genes, and genes containing the Hypoxia Response Element (HRE) RCGTG motif among observed DEGs in KS1 Patient iPSCs, KS1 Patient NSPCs, *Kmt2d*<sup>Δ/Δ</sup> HT22 cells, as well as KMT2D-bound genes in wild-type HT22 cells, and KMT2D-bound, down-regulated genes in *Kmt2d*<sup>Δ/Δ</sup> HT22 cells). Fisher's Exact Test (\*p<0.05, \*\*p<0.01, \*\*\*p<0.001; †FDR<0.05, ††FDR<0.01, †††FDR<0.001).

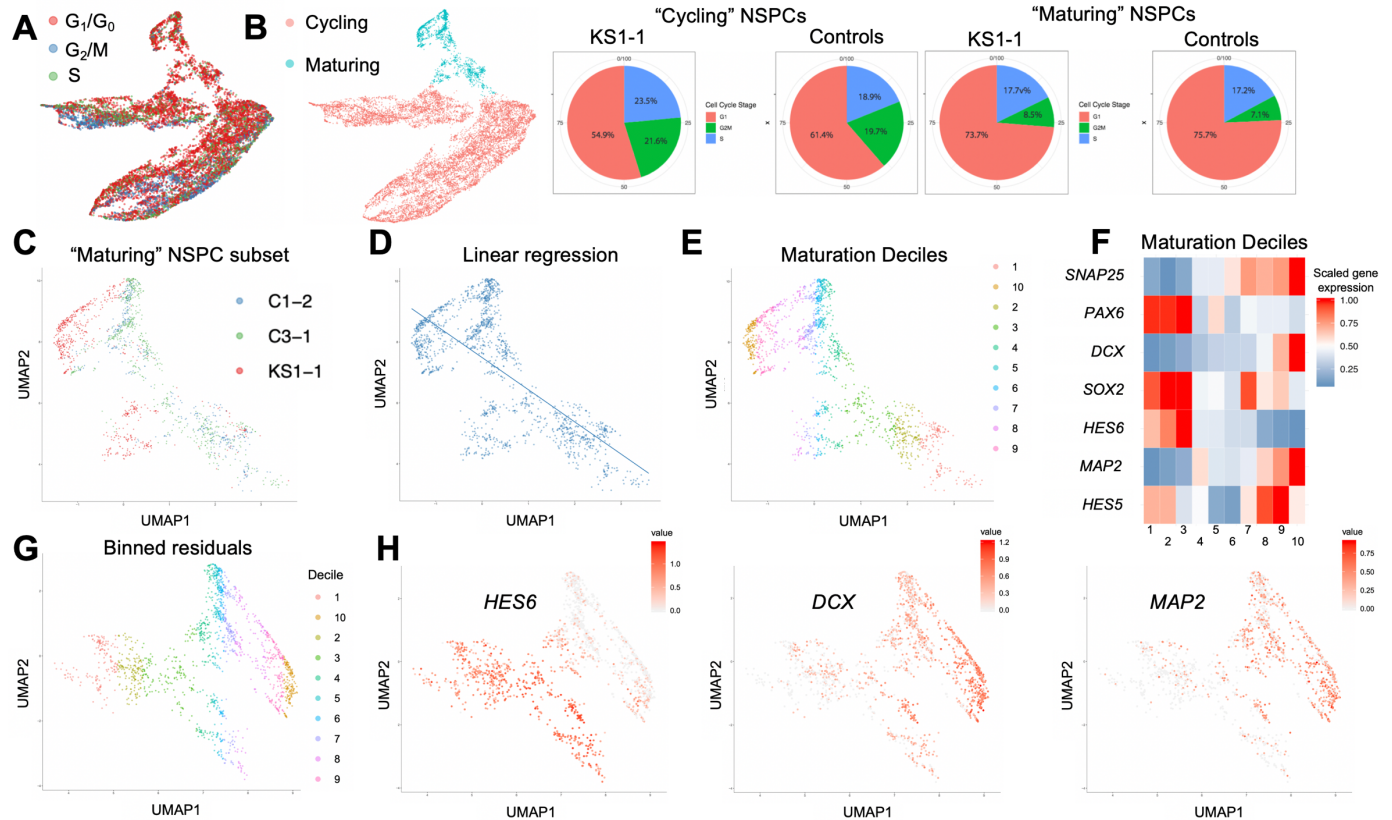

1019  
1020  
1021  
1022  
1023  
1024  
1025  
1026  
1027  
1028  
1029  
1030  
1031  
1032

**Supplementary Figure 5. Stratified scRNA-seq analysis of NSPCs.** Uniform Manifold Approximation Projection (UMAP) of single-cell NSPC libraries partitioned by (A) cell cycle marker expression into subsets of  $G_1/G_0$ , S, and  $G_2/M$  cells, used for cycle phase-stratified differential expression analysis to rule out confounding differences in cell cycle phase composition on NSPC transcriptome comparisons. (B) Subset of “Cycling” versus non-cycling, “Maturing” NSPCs, which includes “Transitioning” and “Differentiating” cells as defined (Figure 4B), and UMAP-based cell cycle occupancies consistent with experimental FACS data (Figure 3F). (C-H) UMAP analysis of Differentiating NSPCs displaying (C) library patient ID’s, (D) smooth linear regression fitted to define the maturation trajectory and (E) binned deciles of progressively maturing cells along the regression. (F) Relative expression of selected NSPC markers defining directionality of the maturation trajectory. (G) Binned residuals used to calculate deciles containing equal number of cells along the axis of differentiation. (H) Representative NSPC marker expression plotted over binned residuals.

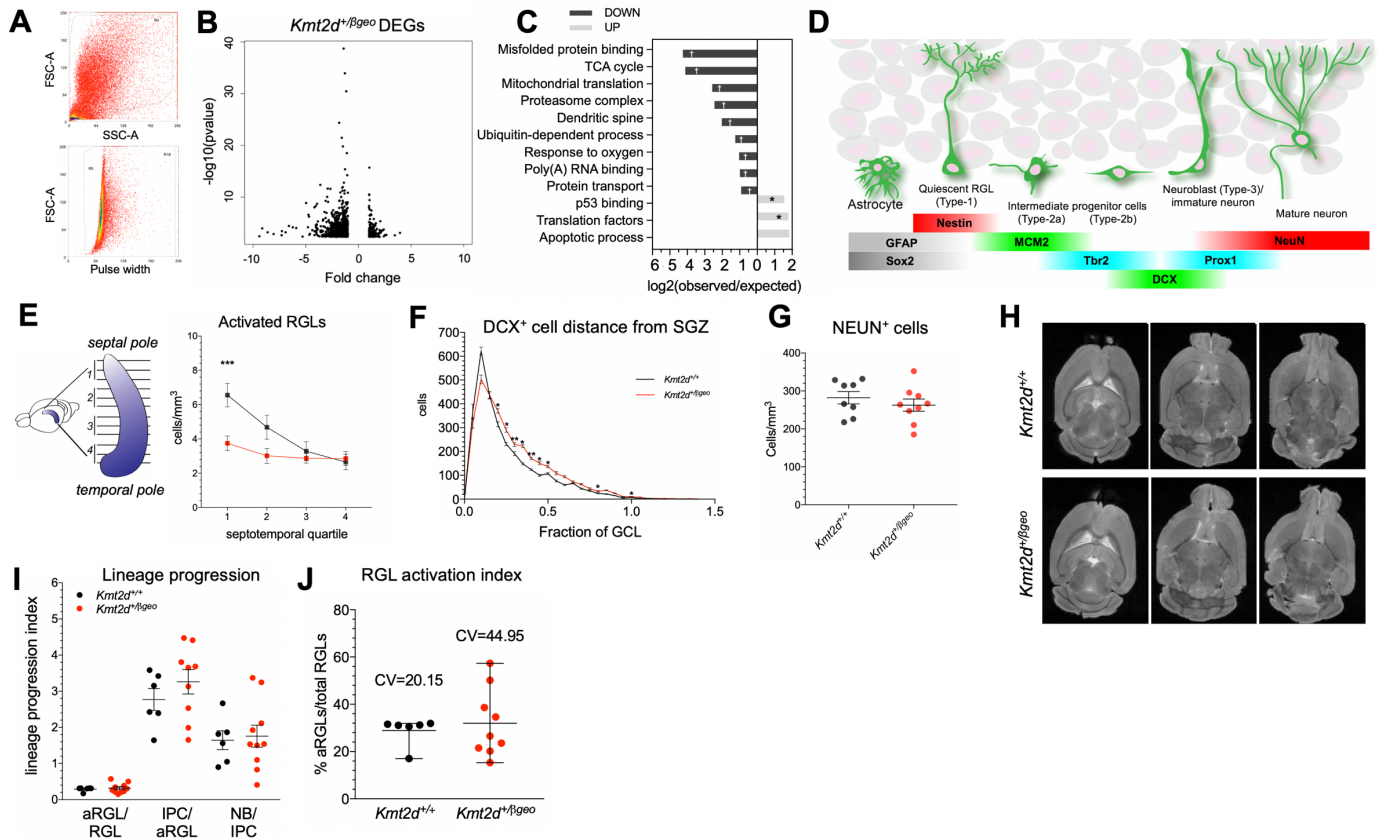

**Supplementary Figure 6. Phenotyping of *Kmt2d*<sup>+/βgeo</sup> mice.** (A) Sample FACS gating for viable nuclei and doublet discrimination during purification of cycling EdU<sup>+</sup> nuclei purified from *Kmt2d*<sup>+/+</sup> and *Kmt2d*<sup>+/βgeo</sup> mice at 16 hours post-EdU pulse for RNA-seq and cell cycle analysis. (B) RNA-seq analysis of differential gene expression in purified EdU<sup>+</sup> DG nuclei from *Kmt2d*<sup>+/+</sup> and *Kmt2d*<sup>+/βgeo</sup> mice. (C) Gene networks most enriched among DEGs down- or up-regulated in *Kmt2d*<sup>+/βgeo</sup> nuclei, showing transcriptional suppression of cellular metabolic pathways. Fisher's Exact Test (†FDR<0.05, ††FDR<0.01, †††FDR<0.001). (D) Schematic depicting marker expression during sequential stages of adult DG neurogenesis. (E) Serial ordering of perfusion-fixed brain slices enables anatomically-stratified analysis of neurogenesis, for quantification of activated RGL NSPC density along the septotemporal axis of the DG in *Kmt2d*<sup>+/+</sup> and *Kmt2d*<sup>+/βgeo</sup> mice, indicating preferential disruption at the septal DG. Two-way ANOVA with post hoc multiple comparisons. (F) Quantification of DCX<sup>+</sup> NB cell body distance from SGZ plane in 8-week-old mice (9-10 mice per genotype, >1,000 cells per mouse). Two-way ANOVA with post hoc multiple comparisons. (G) Quantification of RBFOX3/NEUN<sup>+</sup> mature DG neurons in 8-week-old mice (8-9 mice per genotype, 10 z-stacks per mouse). Student's t-test (n.s.). (H) Sample images of T2-weighted MRI (9.4T) in PFA-fixed brains of female mice 4 months old. (I) Comparison of lineage progression index, an approximation of expansion potential for each cell type transition, indicates absence of genotype-associated blockages at any particular cell-type transition analyzed, and (J) increased Coefficient of Variance (CV) in RGL activation rates in *Kmt2d*<sup>+/βgeo</sup> mice. Bars indicate mean ± SEM. (\*p<0.05, \*\*p<0.01, \*\*\*p<0.001).

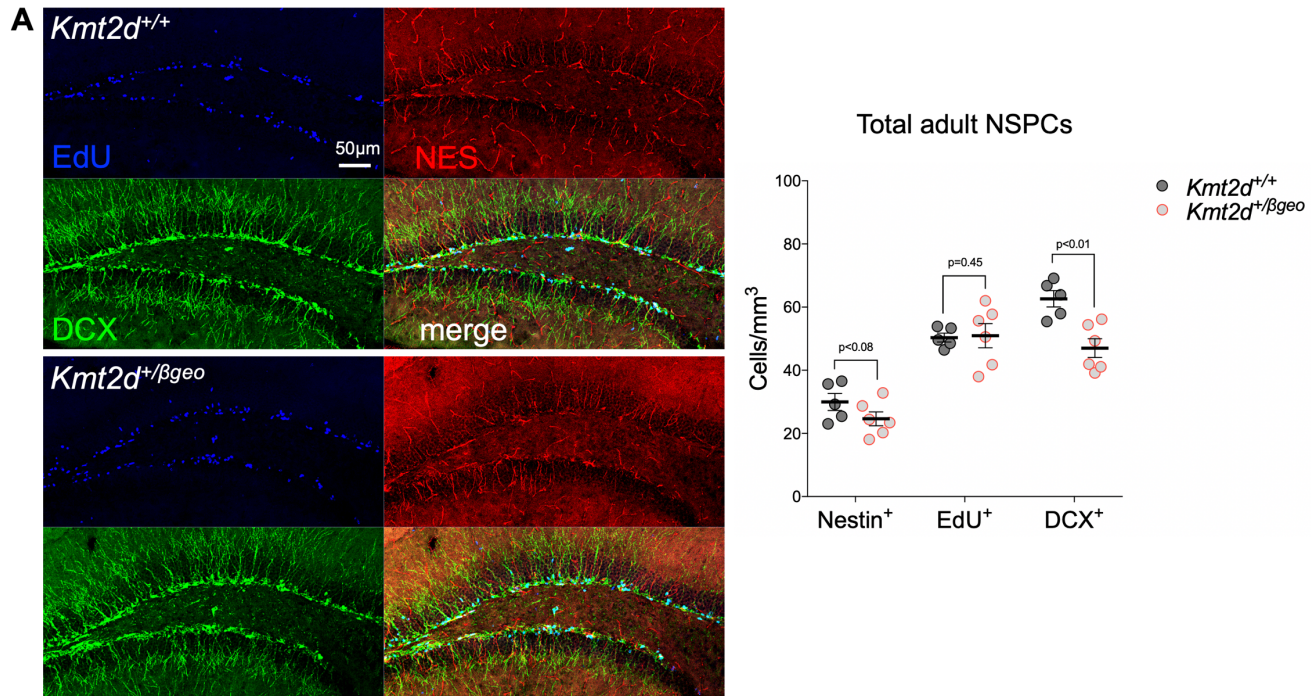

1053  
1054  
1055  
1056  
1057  
1058  
1059  
1060  
1061  
1062

**Supplementary Figure 7. Pulse-labeling to birth-date adult-born NSPCs in vivo. (A)**

Representative immunostaining from *Kmt2d*<sup>+/+</sup> and *Kmt2d*<sup>+/βgeo</sup> mice (5-6 mice per genotype, 10 z-stacks per mouse) of EdU pulse-labeled cells extending a NES<sup>+</sup> process (early RGL NSPCs) or DCX<sup>+</sup> process (maturing NB NSPCs), showing the entire DG area quantified. Steady-state quantification of NSPCs and EdU-labeled NSPCs, confirming steady-state reduction of adult neurogenesis in *Kmt2d*<sup>+/βgeo</sup> mice, despite their increased number of EdU<sup>+</sup>DCX<sup>+</sup> double-labeled NBs in the same experiment (**Figure 5E-F**). Bars indicate mean ± SEM, Student's t-test. Scale bar 50 μm.

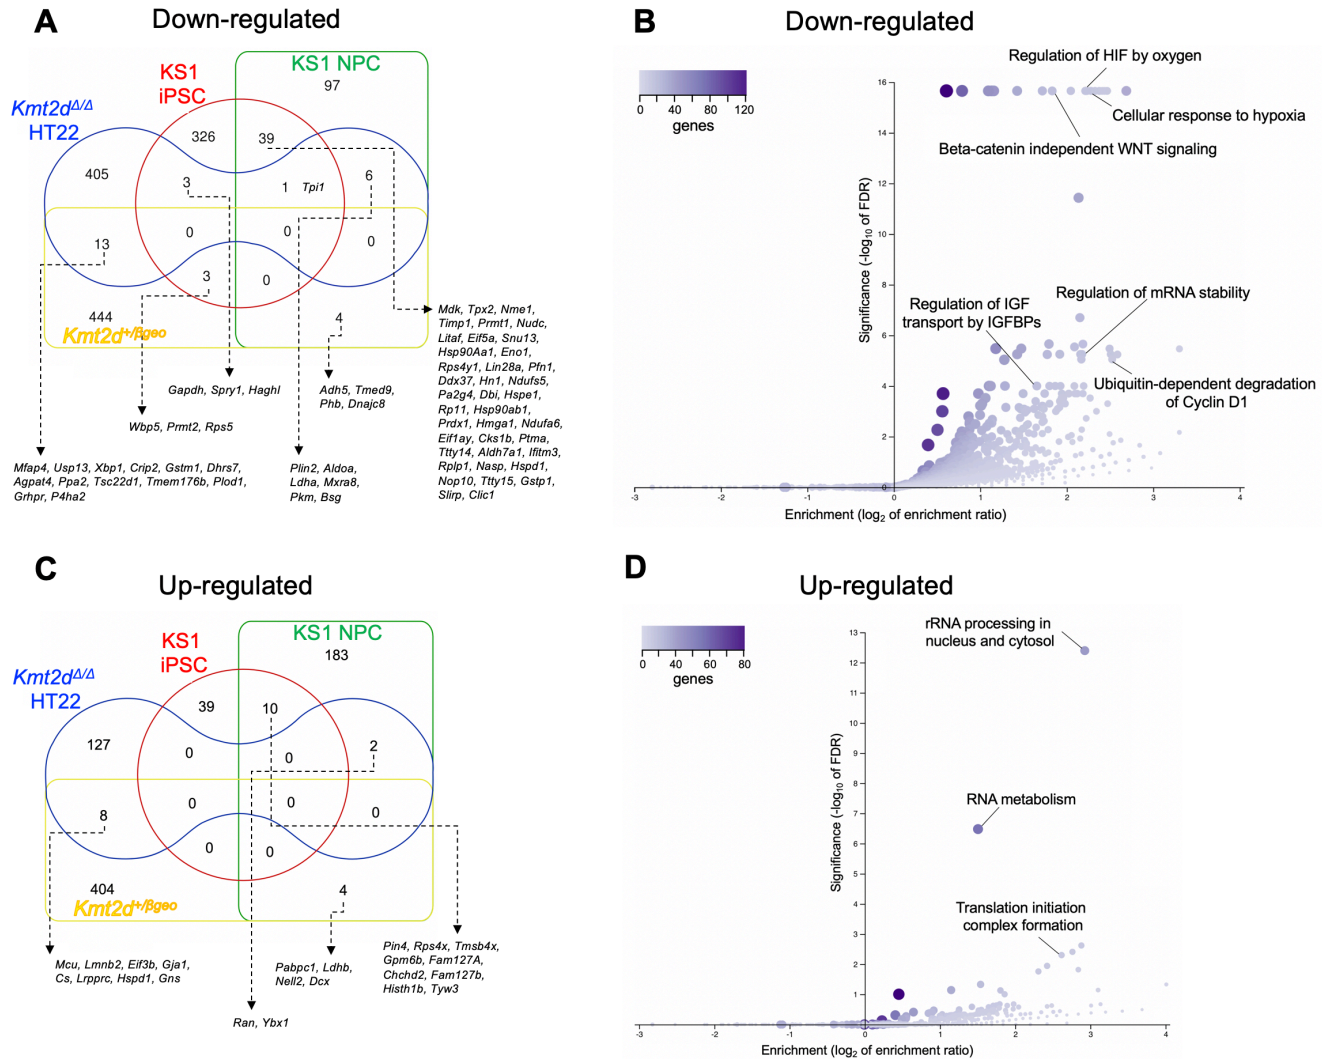

**Supplementary Figure 8. Comparison of gene expression across KS1 models. (A-B)** Euler diagram depicting shared transcriptional downregulation in KS1 models with individual genes **(A)** and pathways enriched among down-regulated genes from all KS1 models presently studied **(B)**. **(C-D)** Euler diagram depicting transcriptional upregulation in KS1 models with individual genes **(C)** and pathways enriched among up-regulated genes from all KS1 models presently studied **(D)**. Enrichments expressed as  $\log_2$  of enrichment ratio. Significance expressed as  $-\log_{10}$  of FDR. (WebGestalt).

1063  
1064  
1065  
1066  
1067  
1068  
1069  
1070  
1071



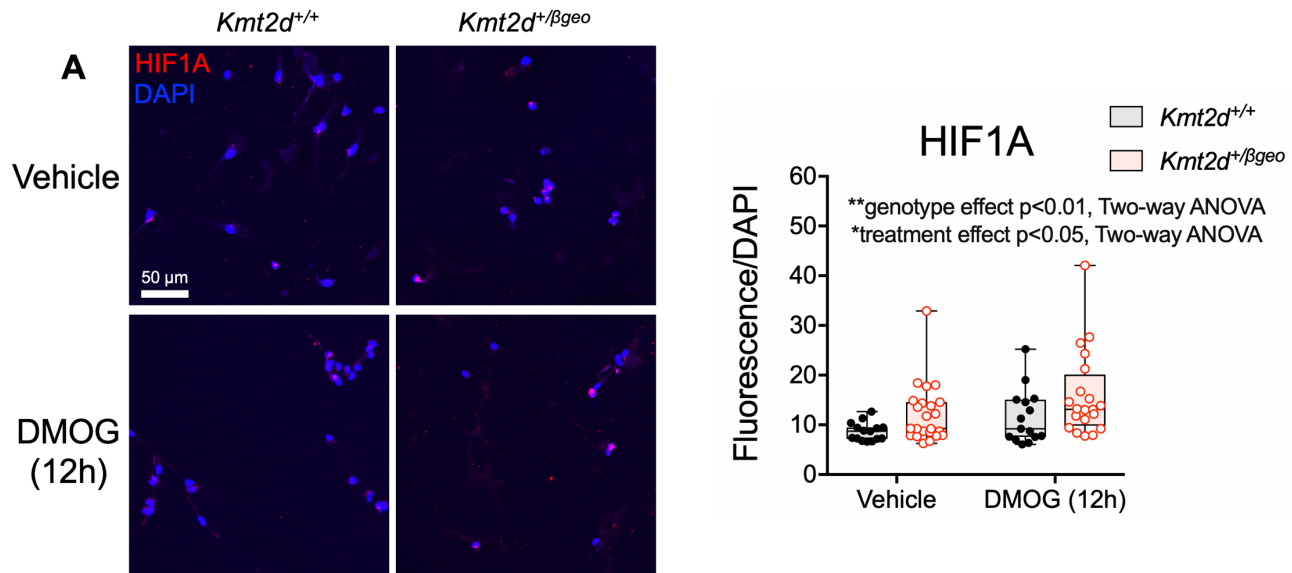

1072  
1073 **Supplementary Figure 9. HIF1A activation in primary hippocampal NSPCs.** (A) Representative  
1074 confocal images of primary hippocampal NSPCs isolated from micro-dissected DG of *Kmt2d*<sup>+/+</sup> and  
1075 *Kmt2d*<sup>+/ $\beta$ geo</sup> mice, with quantification for analysis of HIF1A fluorescence inside the nucleus (DAPI<sup>+</sup>  
1076 volume). Two-way ANOVA with post-hoc multiple comparisons. (\* $p < 0.05$ , \*\* $p < 0.01$ , \*\*\* $p < 0.001$ ). Boxes  
1077 indicate mean  $\pm$  interquartile range; whiskers indicate minima and maxima. Scale bar 50  $\mu$ m.  
1078

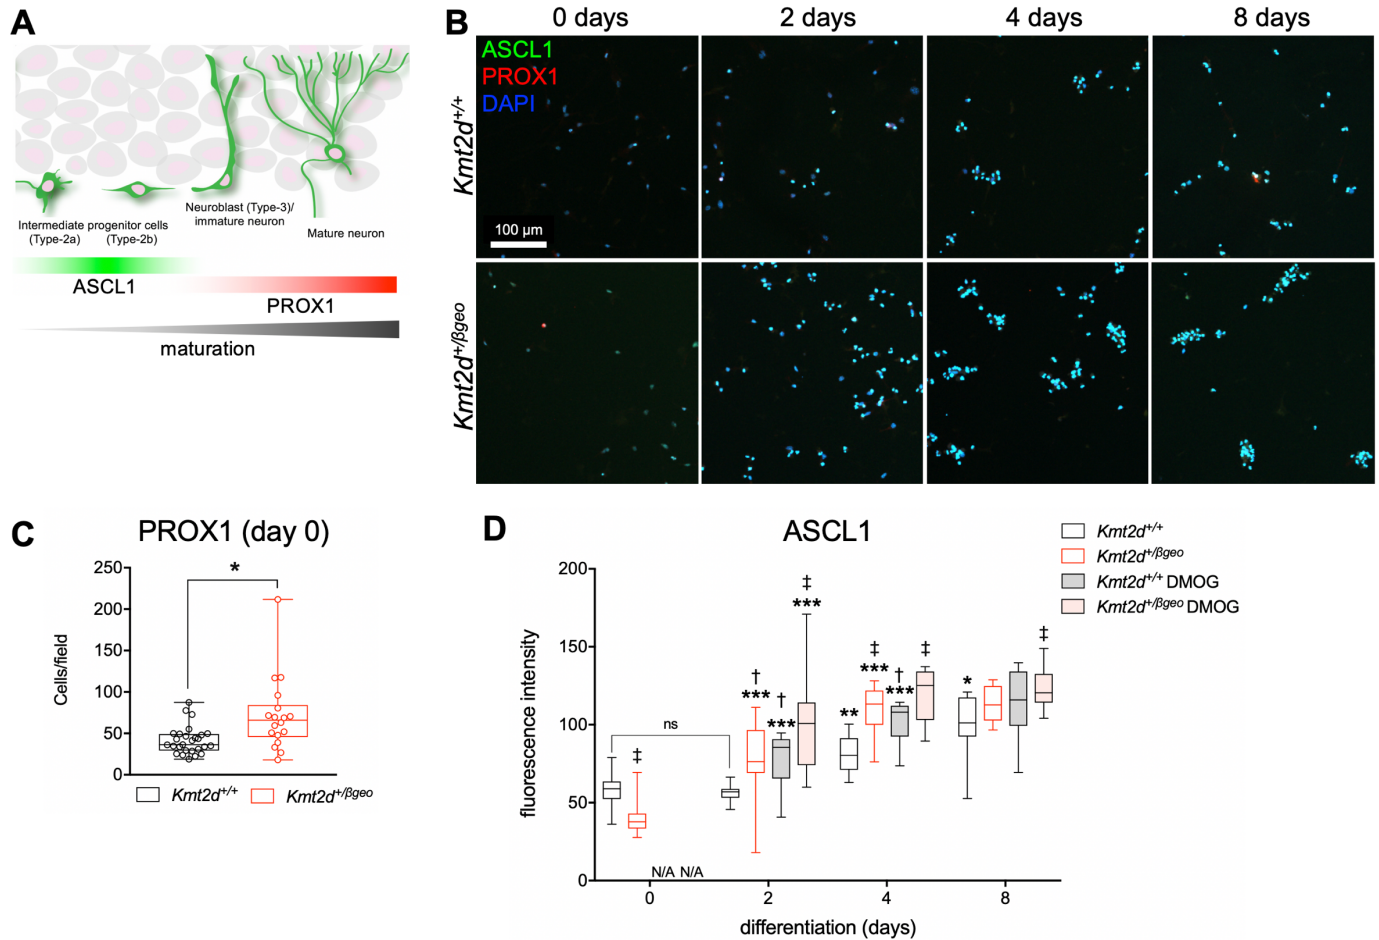

**Supplementary Figure 10. Precocious in vitro differentiation of primary hippocampal NSPCs.** (A) Schematic depicting developmental expression of pro-neural transcription factor ASCL1 and maturing neuronal marker PROX1 in adult-born DG neurons. (B) Representative confocal images for analysis of NSPCs differentiating between 0 and 8 days in primary hippocampal NSPCs isolated from micro-dissected DG of *Kmt2d*<sup>+/+</sup> and *Kmt2d*<sup>+/βgeo</sup> mice, with quantifications (C-D). 22,307 cells analyzed individually across 176 fields of view. Two-way ANOVA with post hoc multiple comparisons. Boxes indicate mean ± interquartile range; whiskers indicate minima and maxima. (significance from previous time point \*p<0.05, \*\*p<0.01; \*\*\*p<0.001; significance from vehicle-treated wild-type †p<0.05, ‡p<0.01). Scale bar 100 μm.

1079  
1080  
1081  
1082  
1083  
1084  
1085  
1086  
1087  
1088  
1089  
1090  
1091  
1092
